# Supplementary material for: Meglumine catalyzed one-pot, three-component combinatorial synthesis of pyrazoles bearing a coumarin unit
Source: Royal Society of Chemistry journal article supplement (doi:10.1039/c5ra01677k), 2015-01-01

# Meglumine catalyzed one-pot, three-component combinatorial synthesis of pyrazoles bearing a coumarin unit

Xiao-Tang Li<sup>a</sup>, Yu-Heng Liu<sup>b</sup>, Xin Liu<sup>a</sup>, Zhan-Hui Zhang<sup>a,\*</sup>

<sup>a</sup>*College of Chemistry and Material Science, Hebei Normal University, Shijiazhuang 050024, PR China*

<sup>b</sup>*The College of Preclinical Medicine, Hebei Medical University, Shijiazhuang 050017, PR China*

## Table of Contents

|                                               |        |
|-----------------------------------------------|--------|
| Copies of NMR spectra for produ <b>4a-4ae</b> | S2-S32 |
|-----------------------------------------------|--------|

Chemical structure of 2-(4-methyl-1-phenyl-1H-imidazol-2-yl)-2H-chromene is shown above the spectrum.

<sup>1</sup>H NMR spectrum (ppm (t1)) showing peaks and integration values:

| Chemical Shift (ppm) | Integration |
|----------------------|-------------|
| 7.550                | 0.96        |
| 7.547                | 0.96        |
| 7.533                | 0.96        |
| 7.519                | 0.96        |
| 7.516                | 0.96        |
| 7.462                | 0.96        |
| 7.417                | 0.96        |
| 7.413                | 0.96        |
| 7.399                | 0.96        |
| 7.396                | 0.96        |
| 7.380                | 0.96        |
| 7.339                | 0.96        |
| 7.330                | 0.96        |
| 7.327                | 0.96        |
| 7.322                | 0.96        |
| 7.312                | 0.96        |
| 7.260                | 0.96        |
| 7.250                | 0.96        |
| 7.235                | 0.96        |
| 6.610                | 0.96        |
| 2.397                | 3.00        |

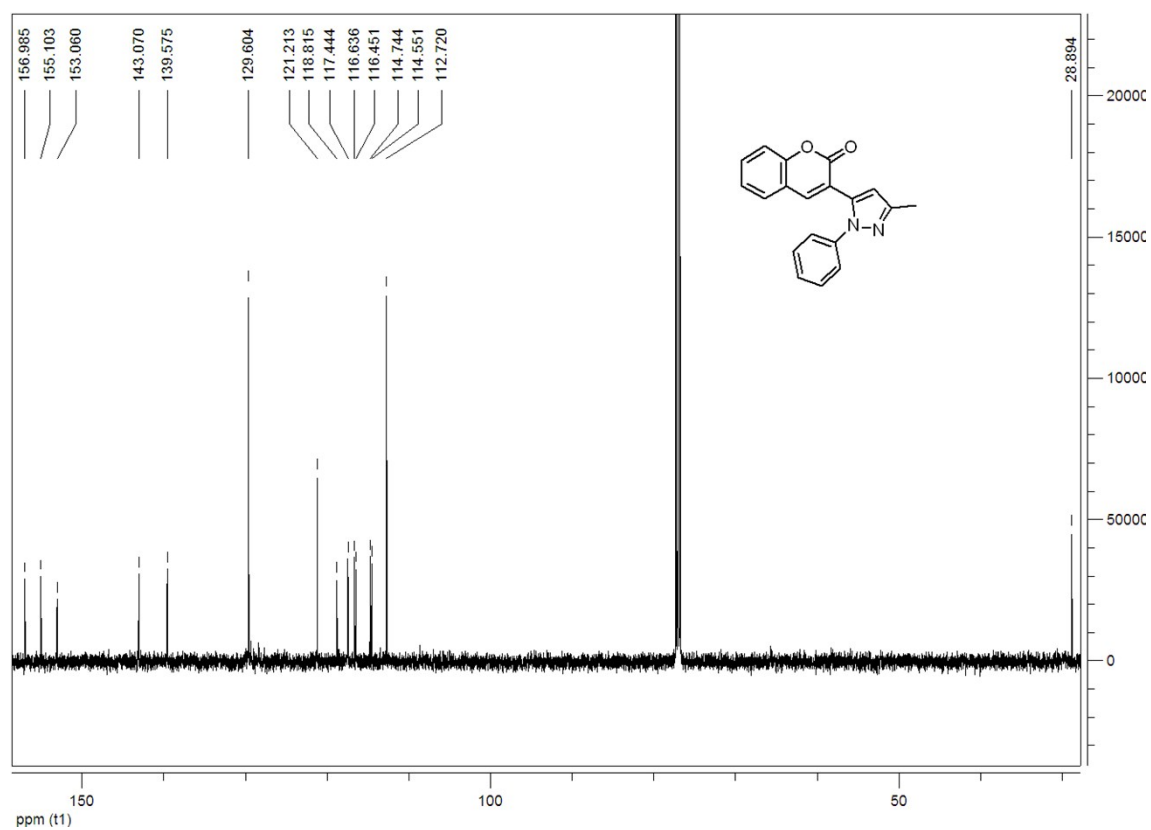

$^1\text{H}$  NMR and  $^{13}\text{C}$  NMR of compound **4b**

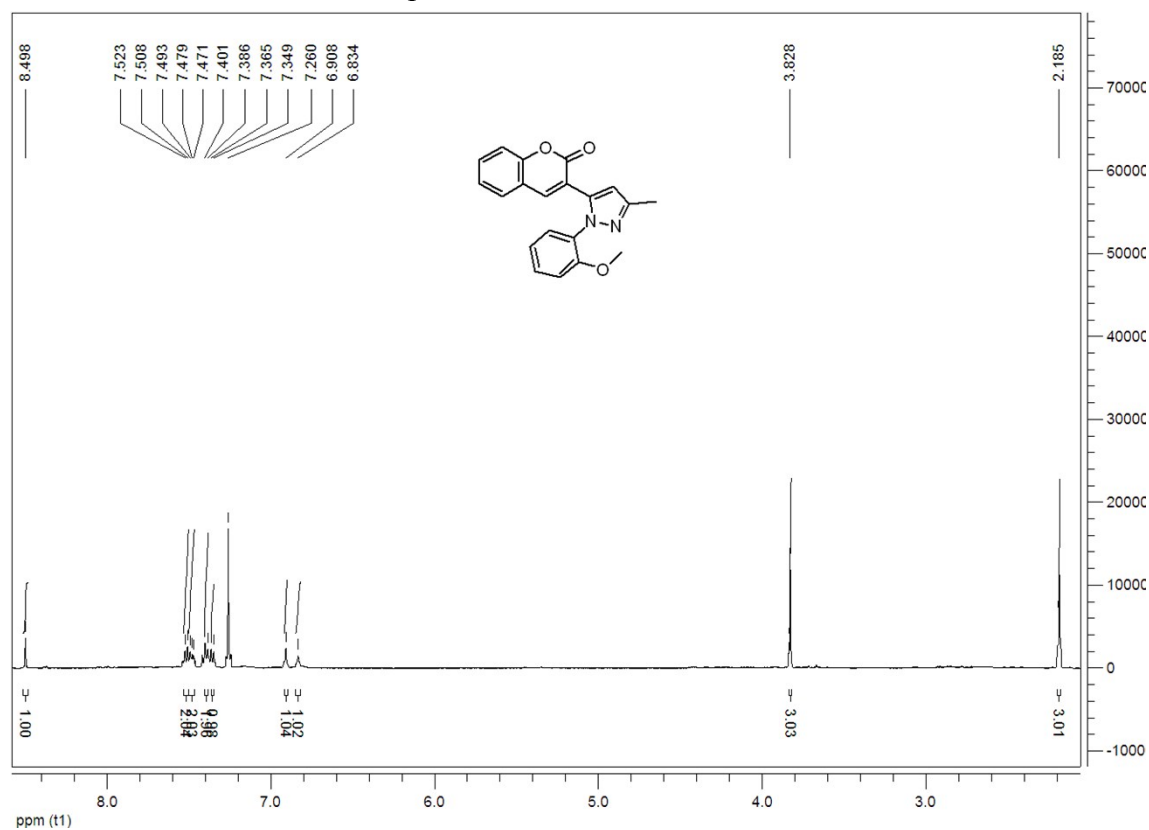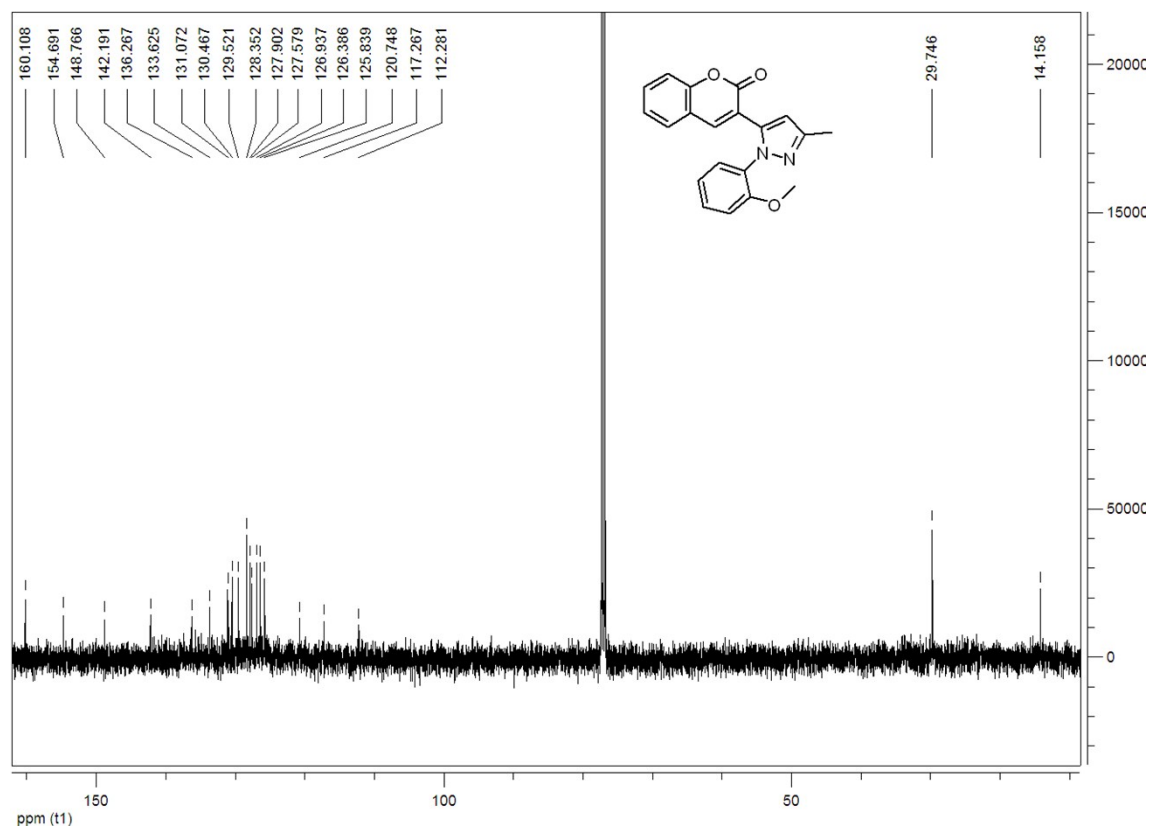

$^1\text{H}$  NMR and  $^{13}\text{C}$  NMR of compound **4c**

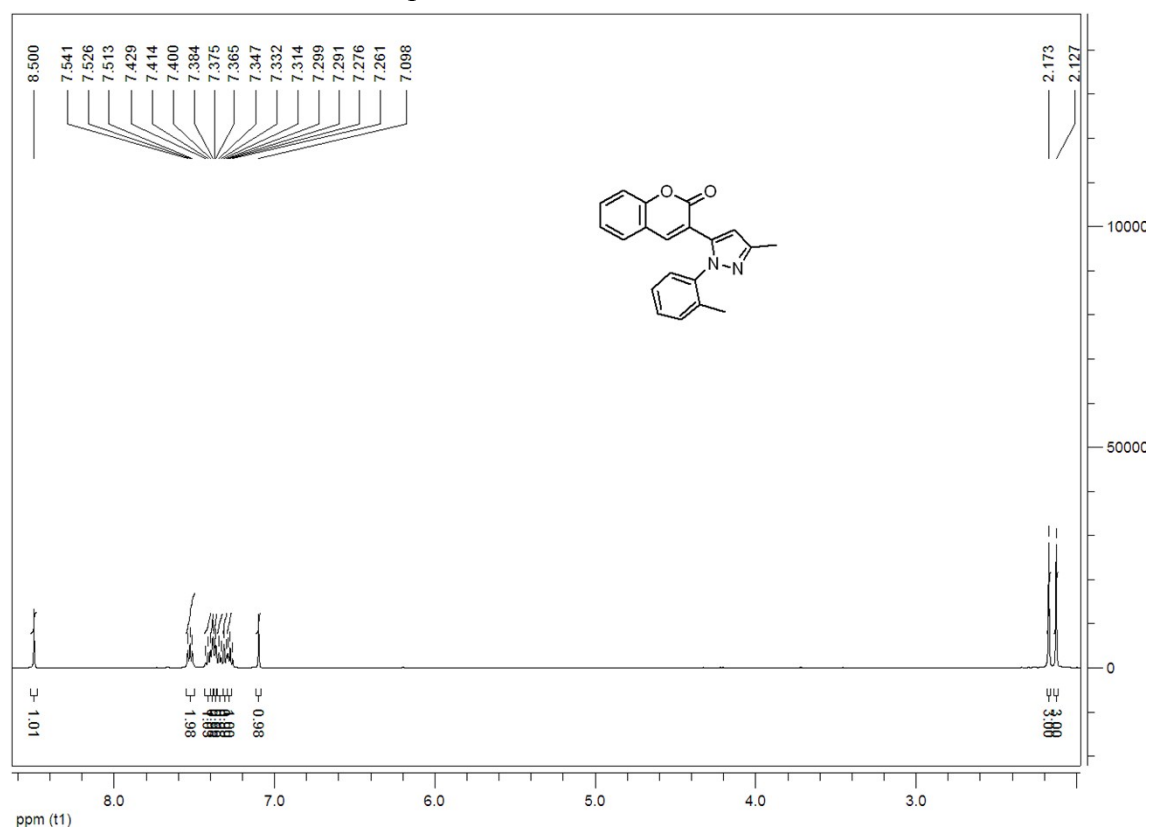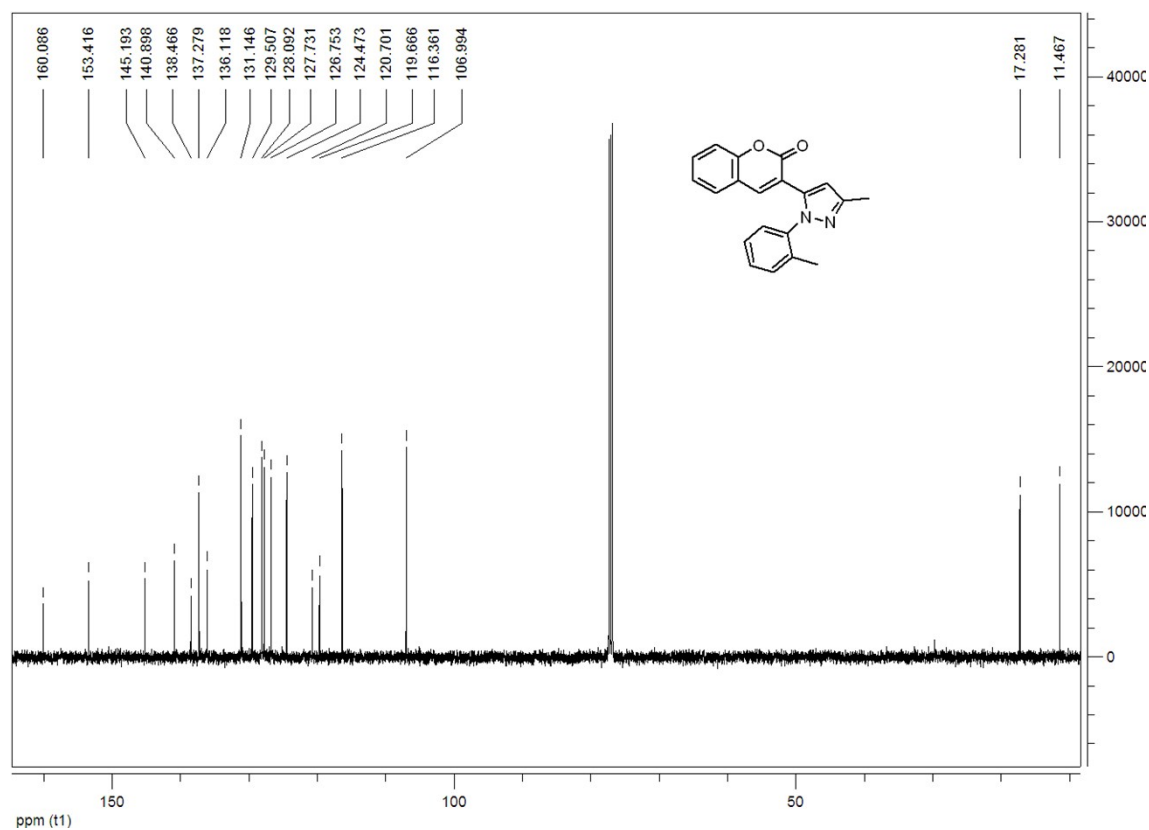

Chemical structure: Cc1ccc(cc1)n2nc(C)cc2C3=CC(=O)OC4=CC=CC=C34

<sup>1</sup>H NMR spectrum (ppm (t1)):

- 8.512
- 7.556
- 7.541
- 7.522
- 7.506
- 7.491
- 7.399
- 7.384
- 7.369
- 7.354
- 7.336
- 7.290
- 7.275
- 7.260
- 7.247
- 7.232
- 7.064
- 2.444
- 2.370

Integration values: 96.0, 68.6, 98.7, 98.6, 96.0, 96.7, 100.6.

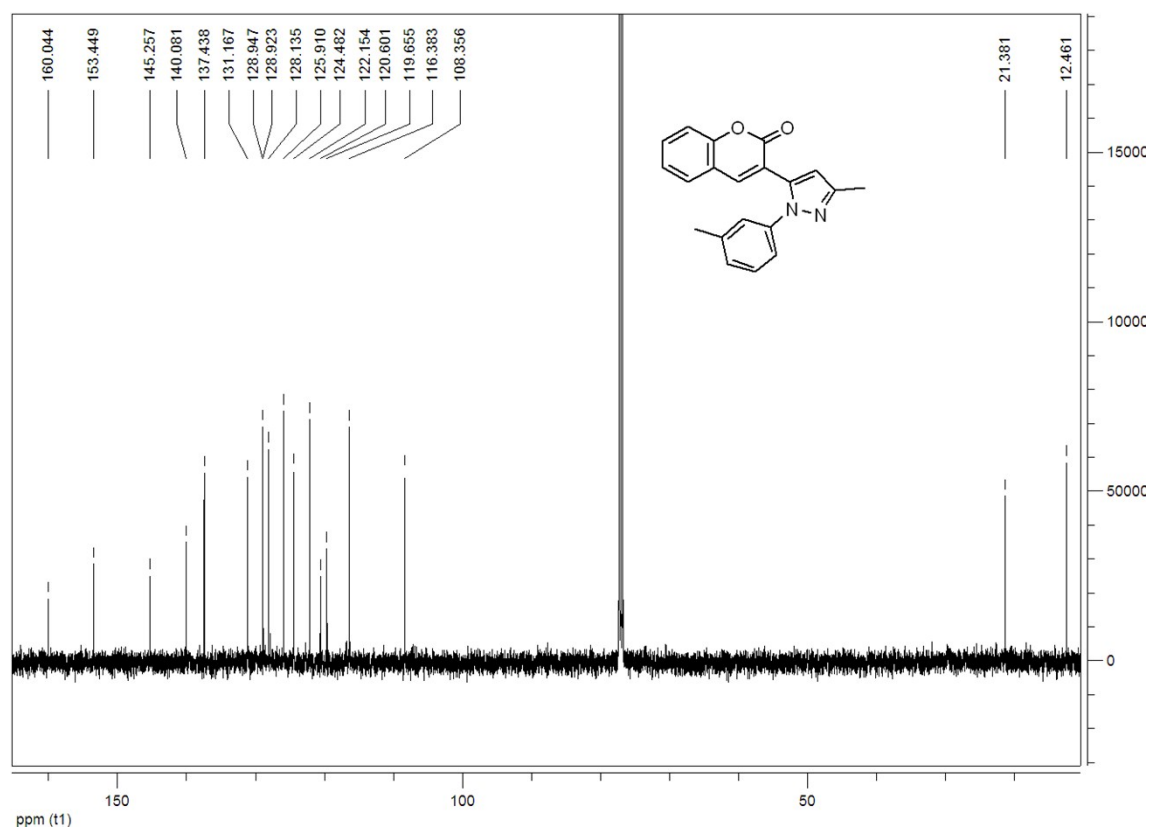

$^1\text{H}$  NMR and  $^{13}\text{C}$  NMR of compound 4e

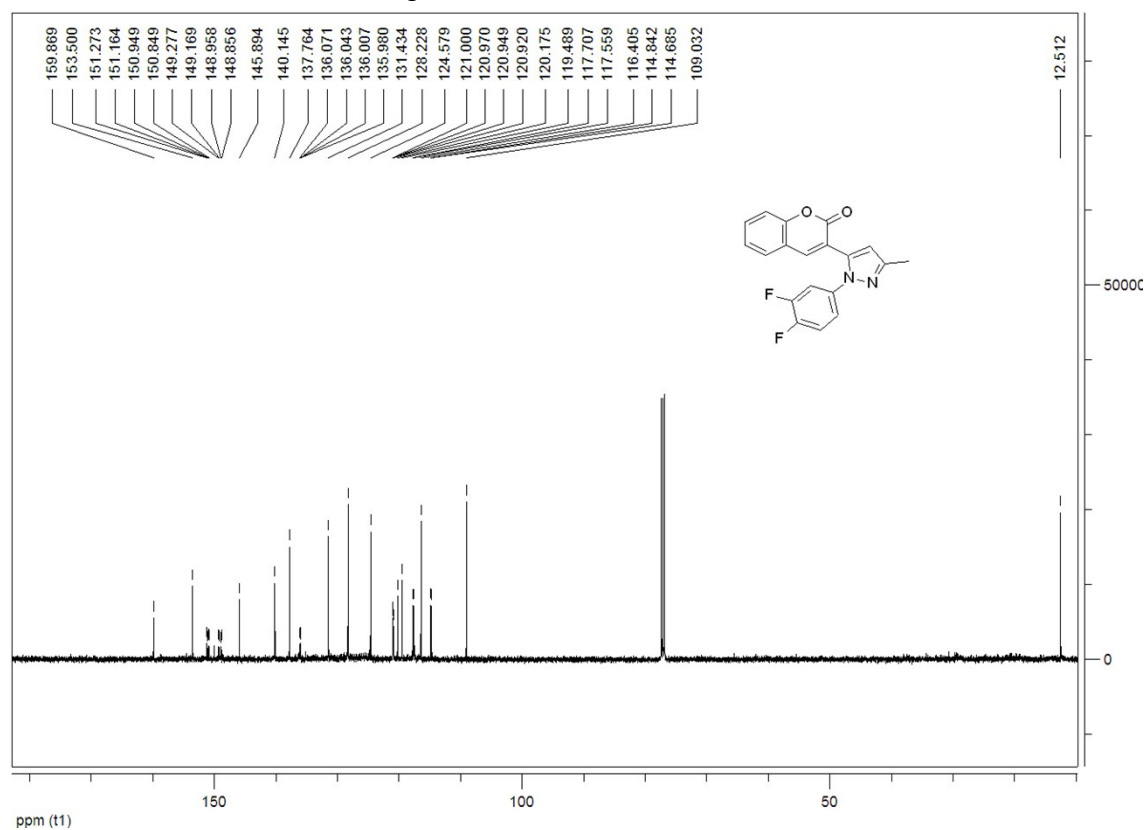

4l

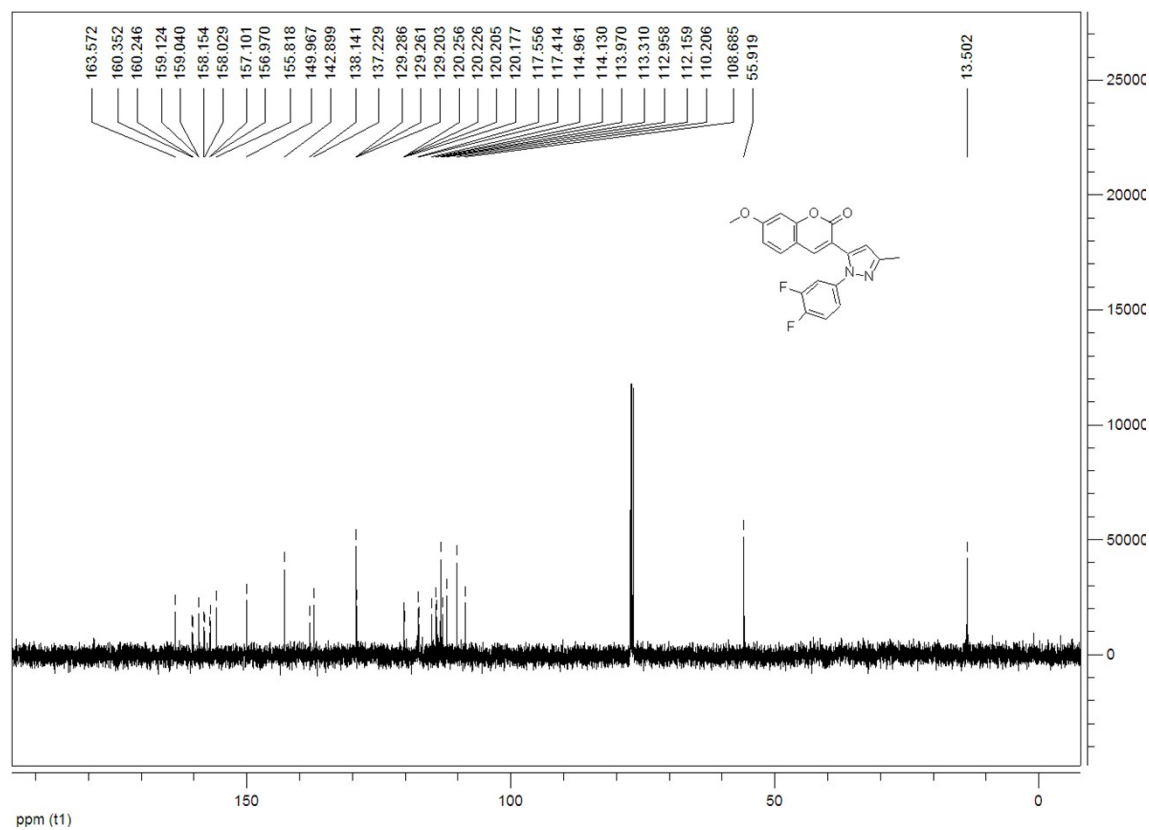

$^1\text{H}$  NMR and  $^{13}\text{C}$  NMR of compound 4f

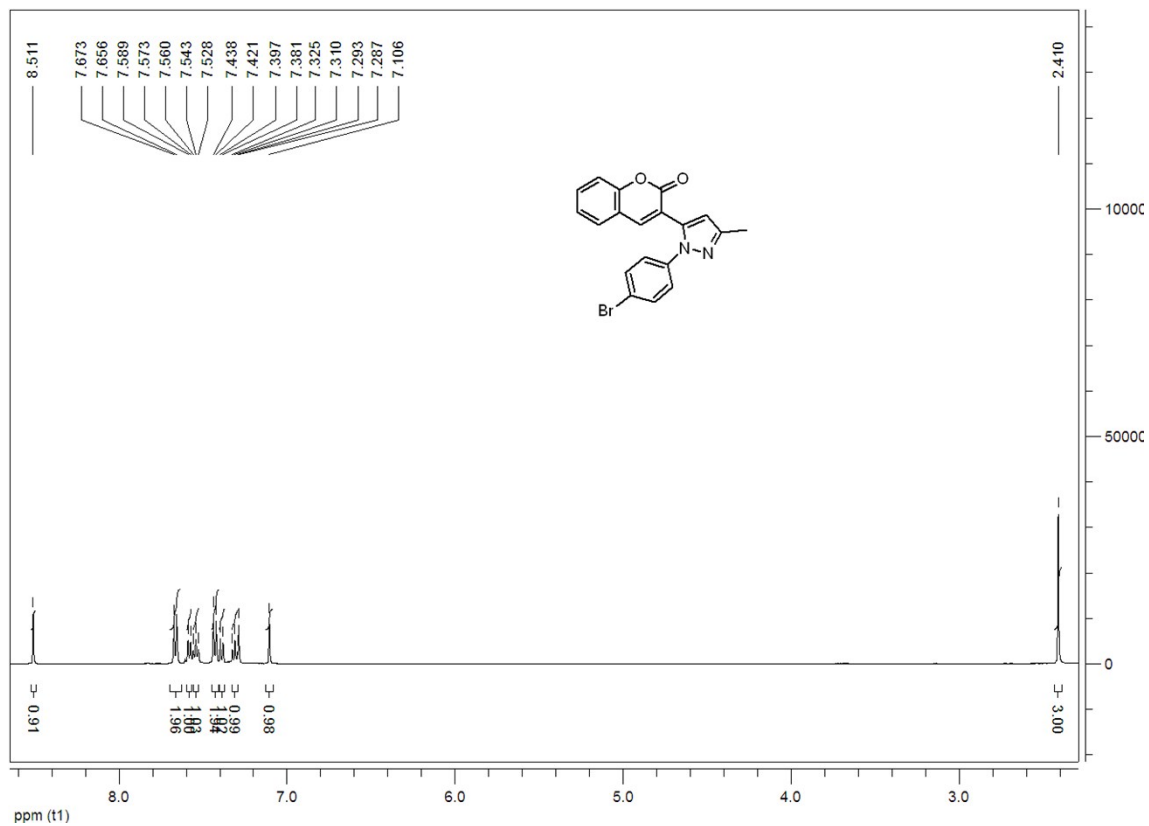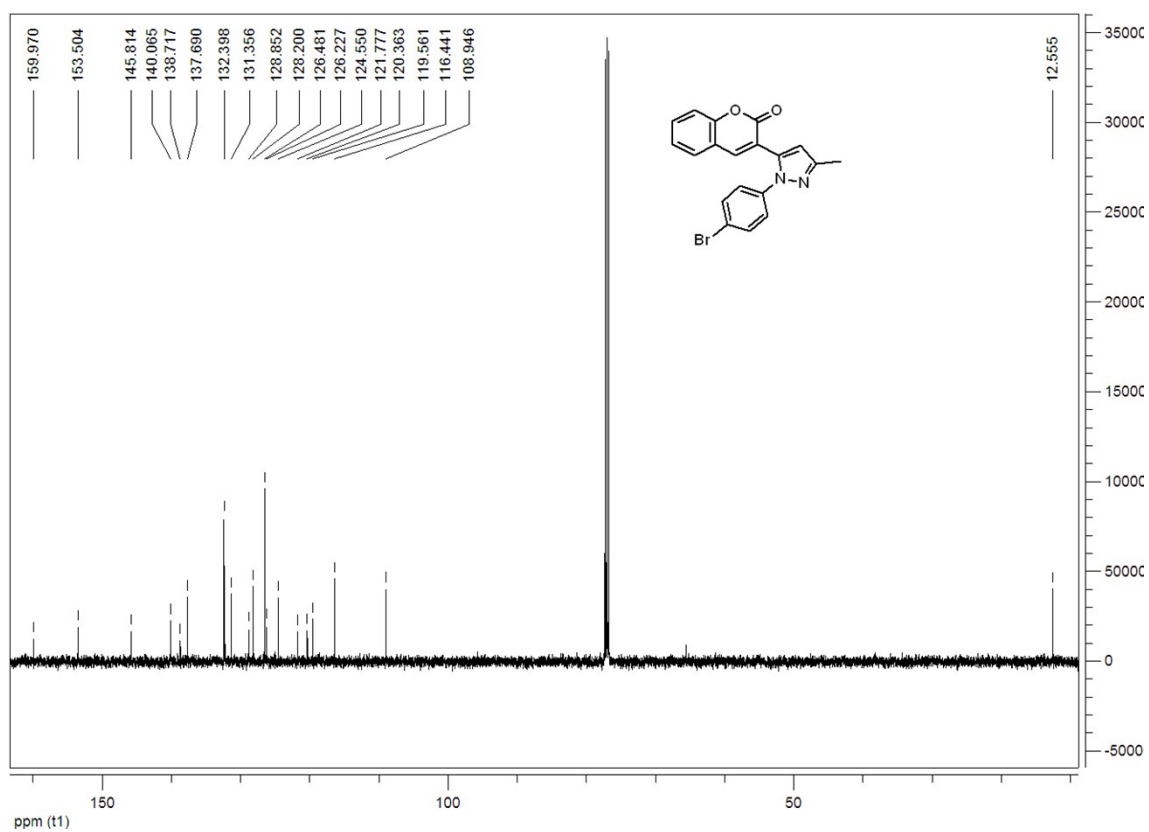

$^1\text{H}$  NMR and  $^{13}\text{C}$  NMR of compound **4g**

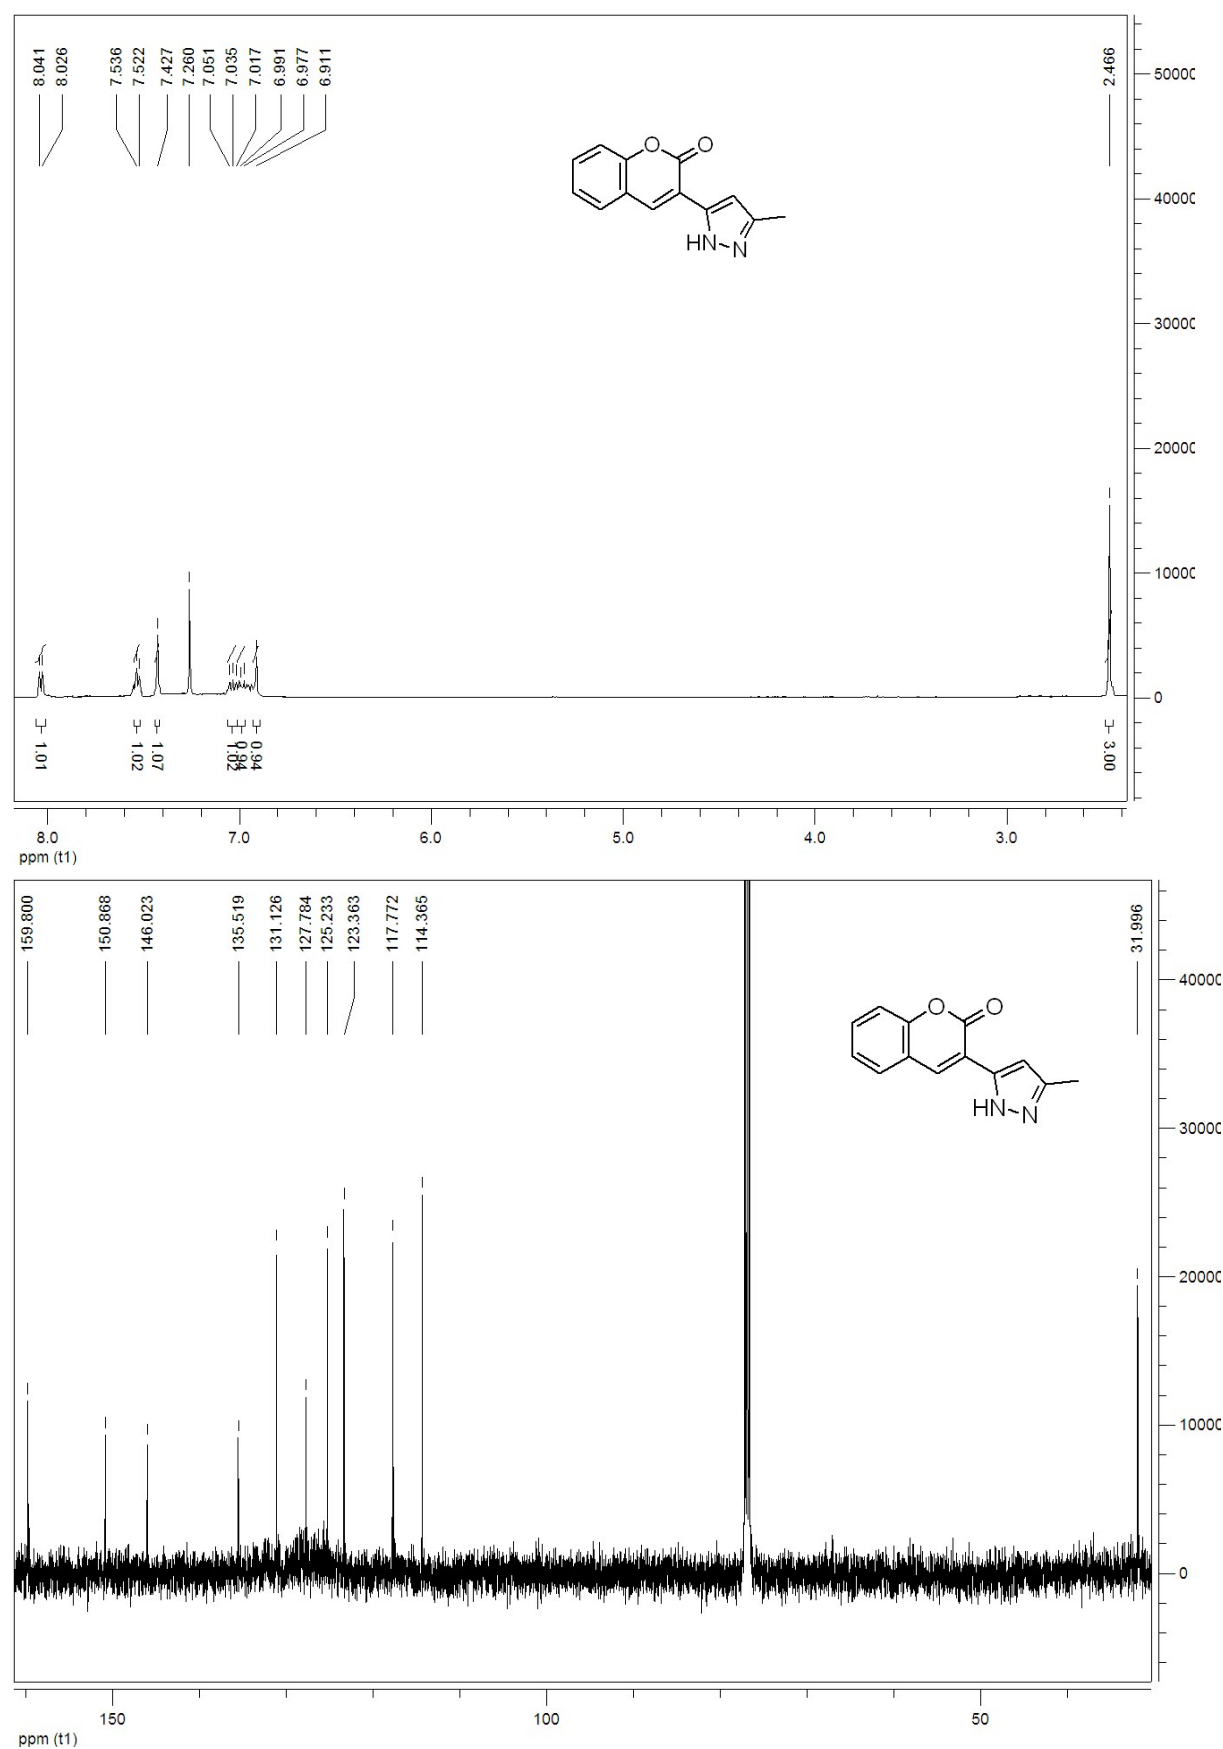



<sup>1</sup>H NMR and <sup>13</sup>C NMR of compound 4h

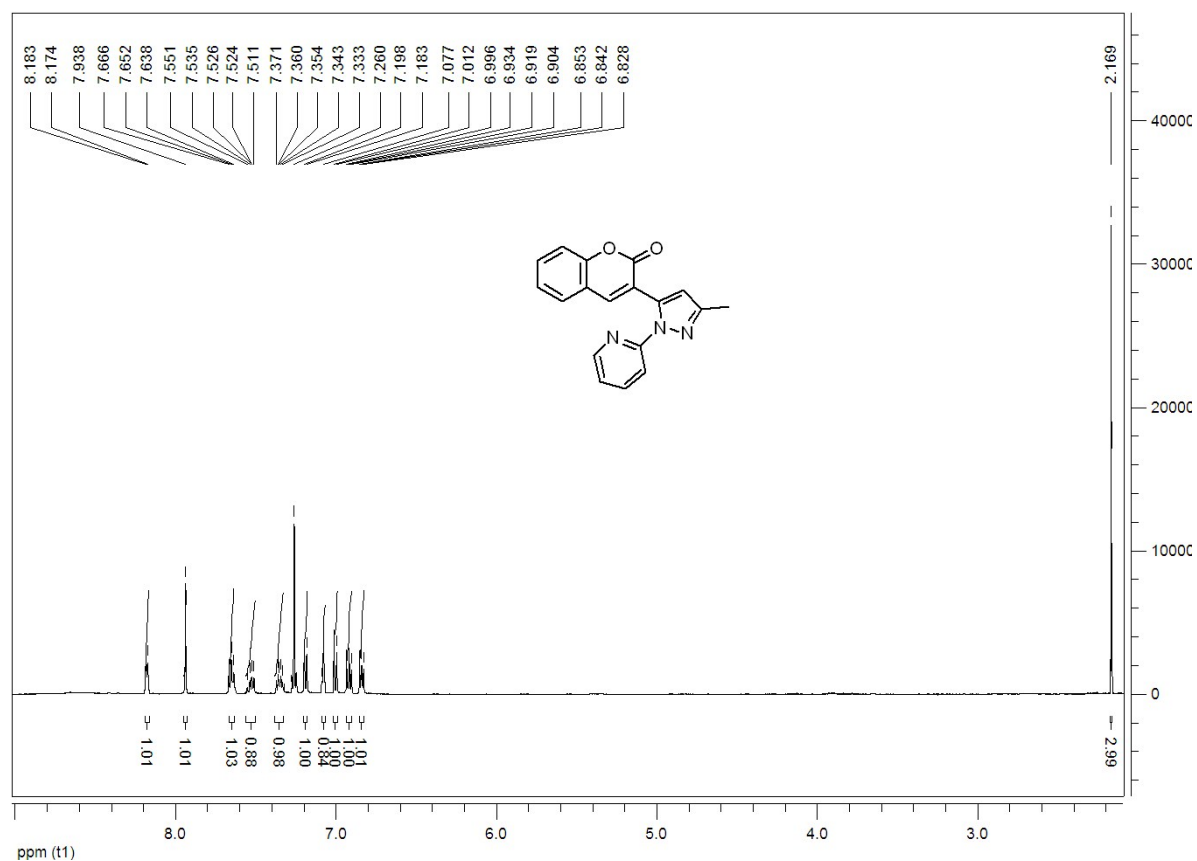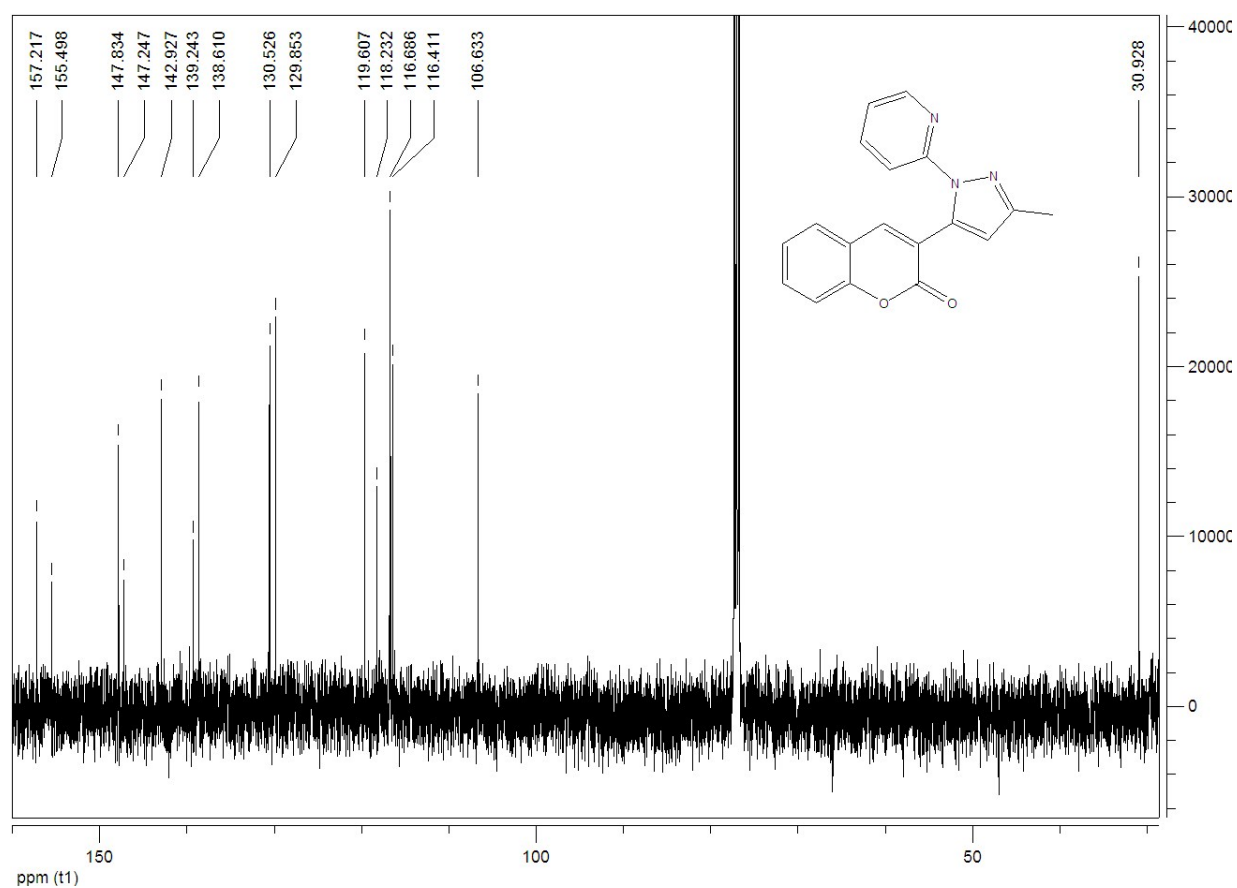

$^1\text{H}$  NMR and  $^{13}\text{C}$  NMR of compound 4i

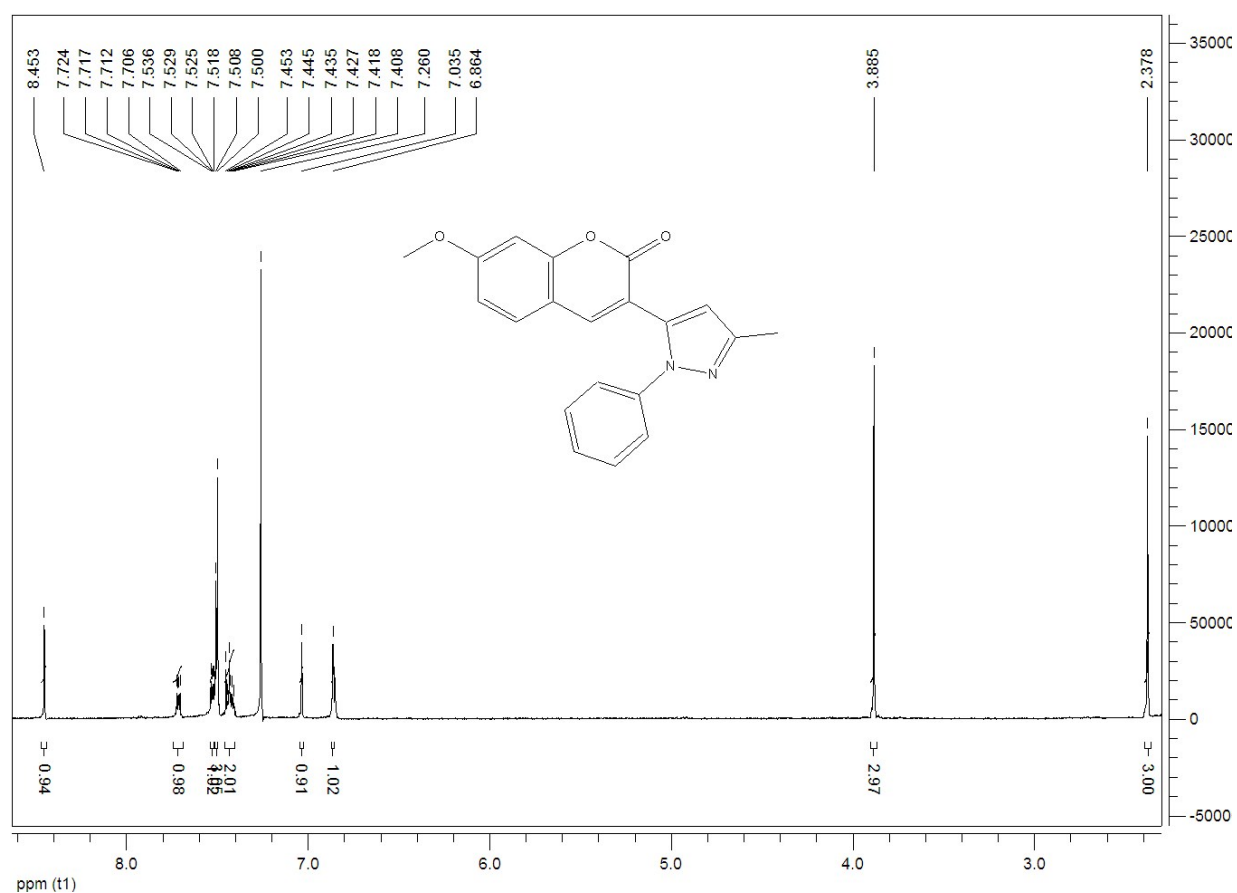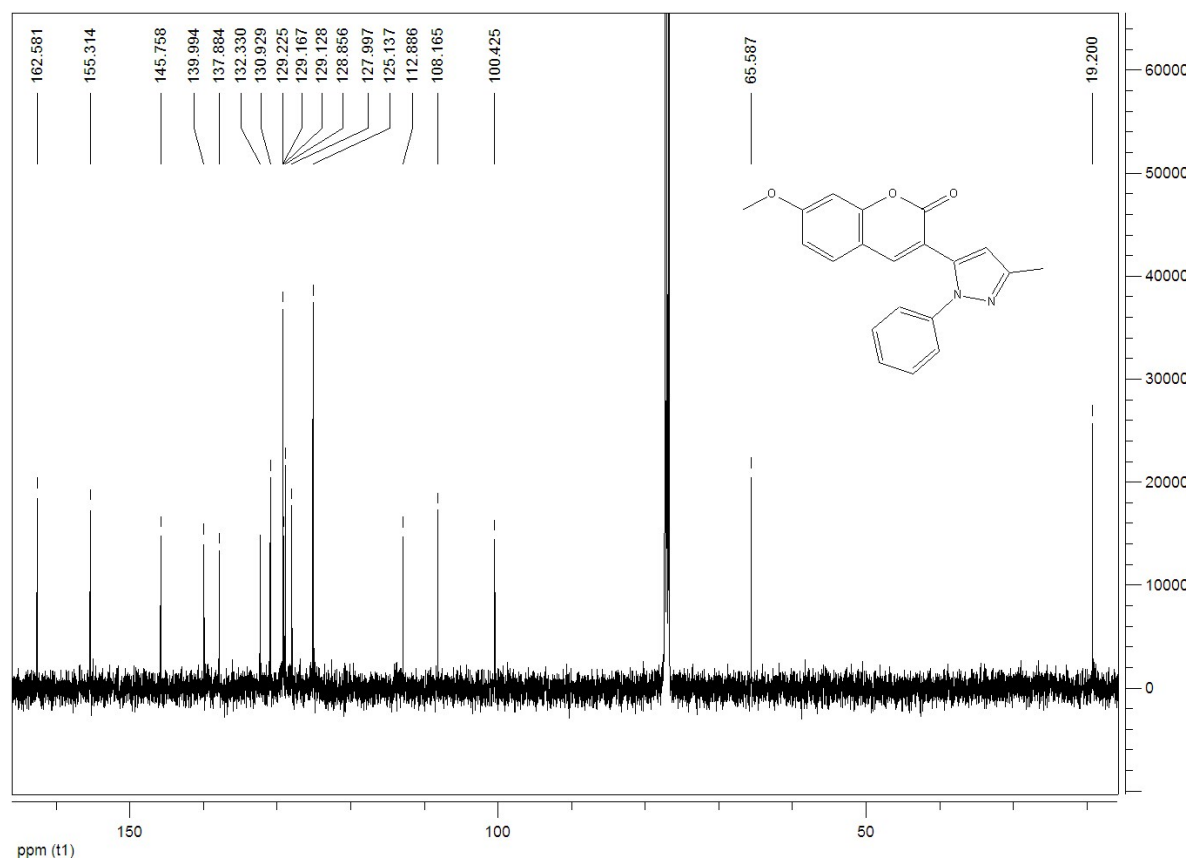

$^1\text{H}$  NMR and  $^{13}\text{C}$  NMR of compound **4j**

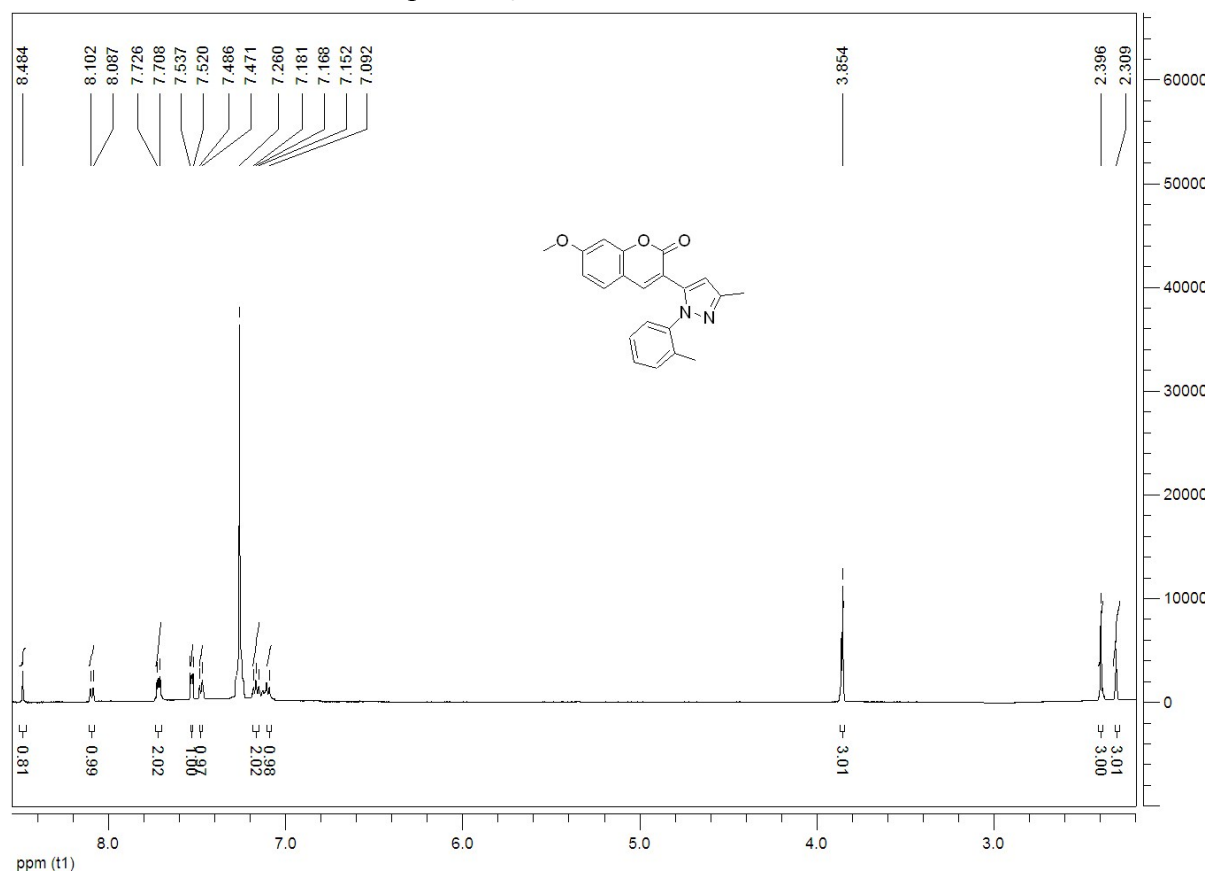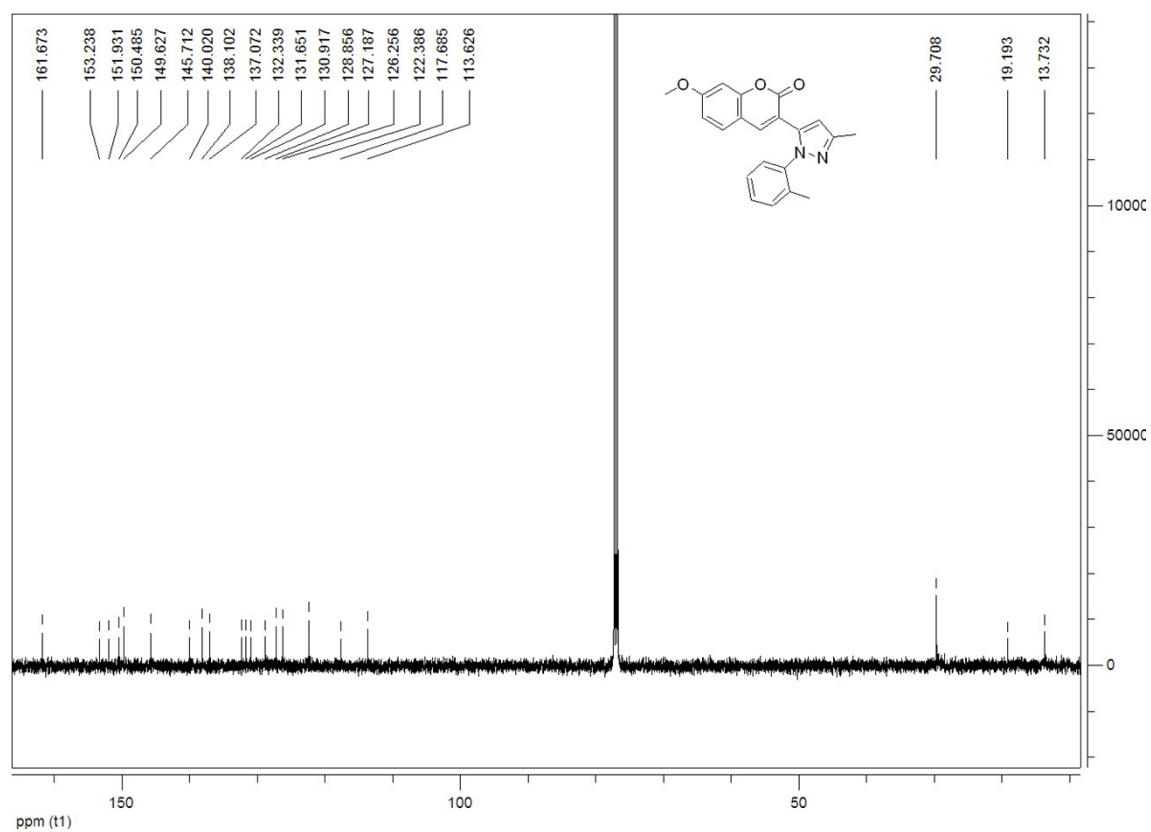

<sup>1</sup>H NMR and <sup>13</sup>C NMR of compound 4k

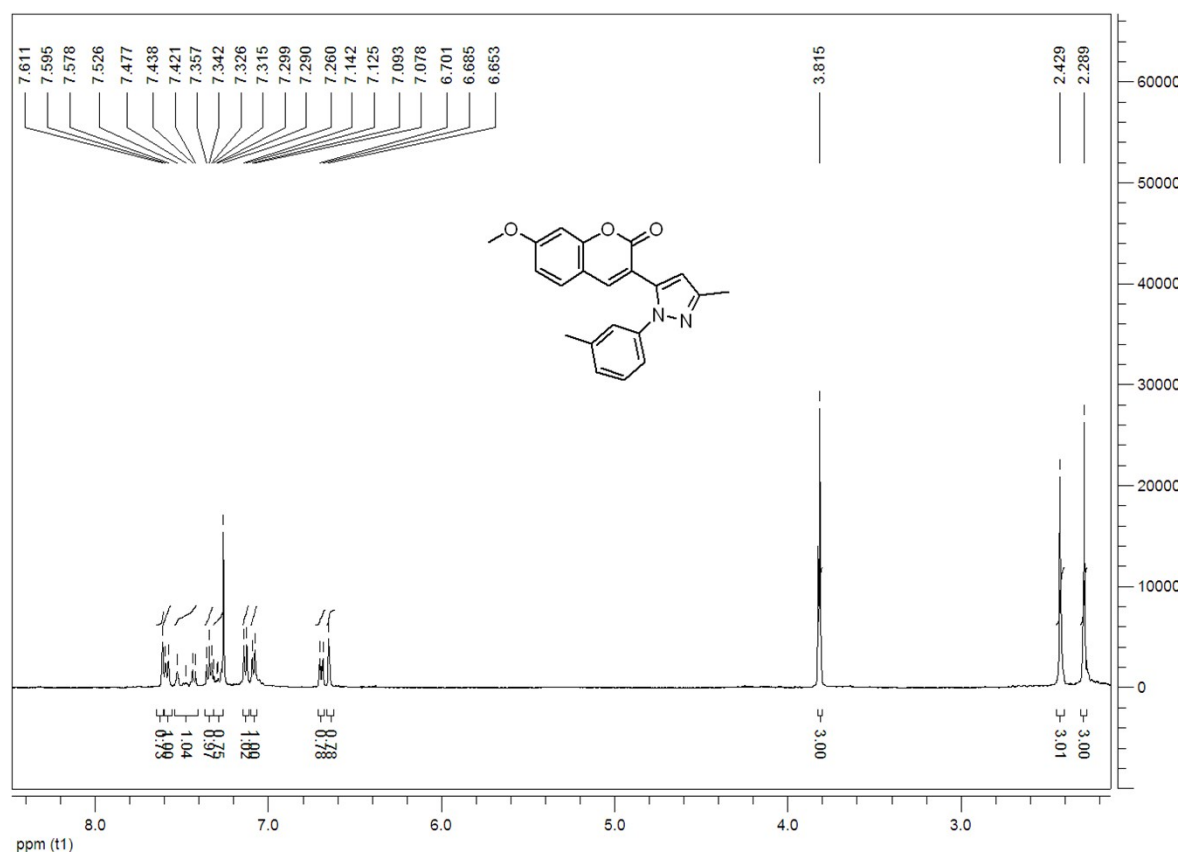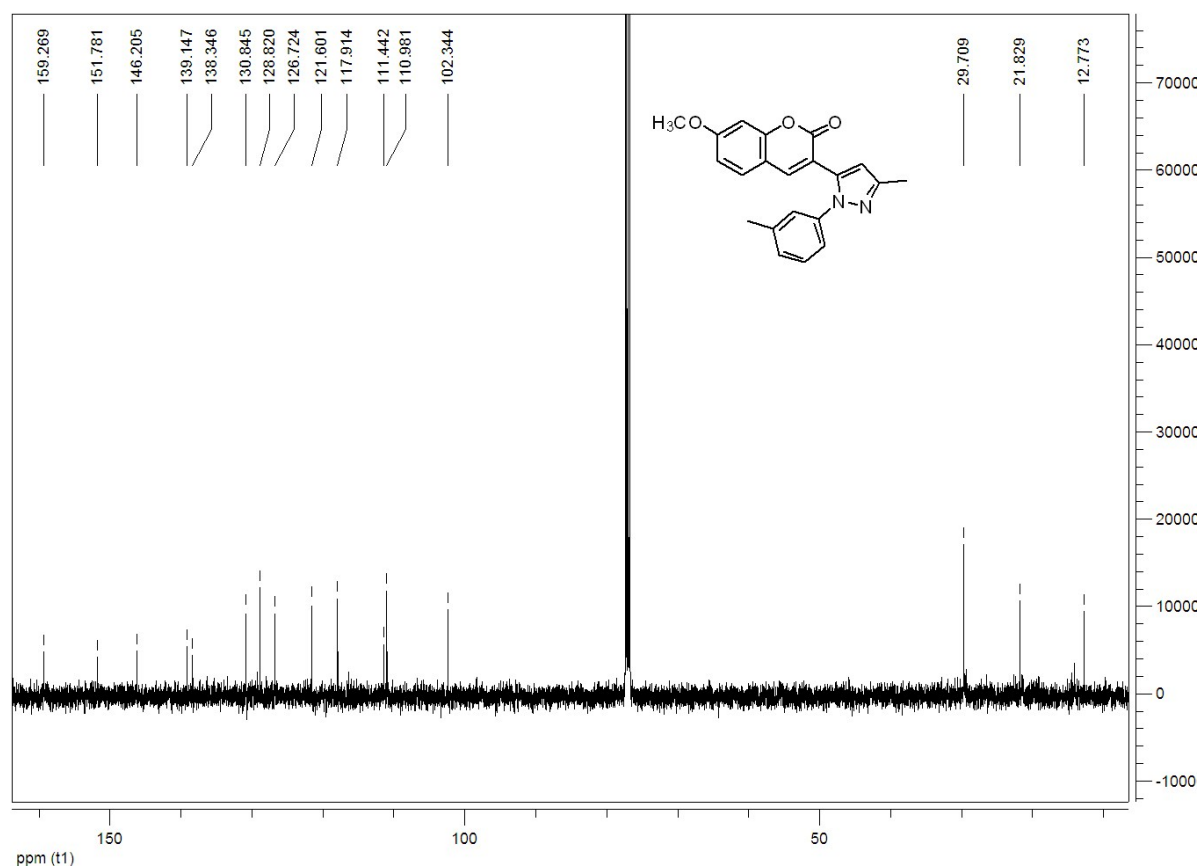

$^1\text{H}$  NMR and  $^{13}\text{C}$  NMR of compound 41

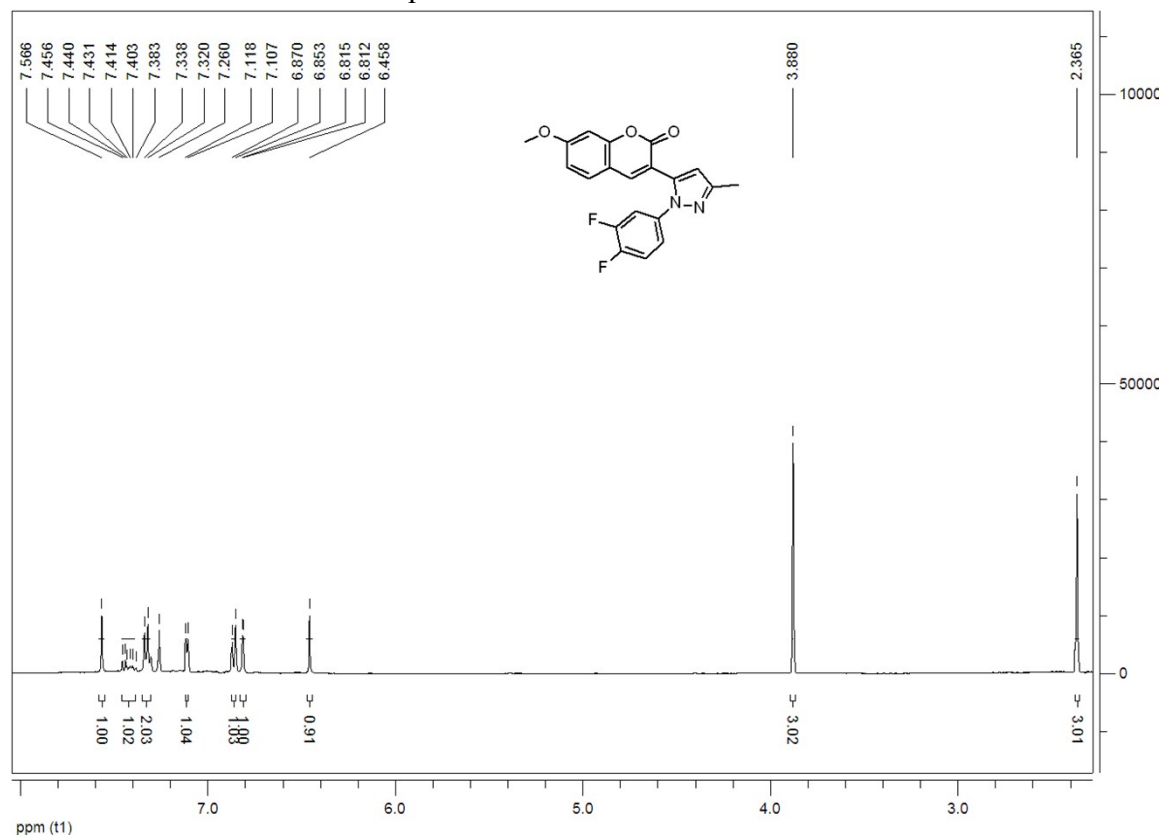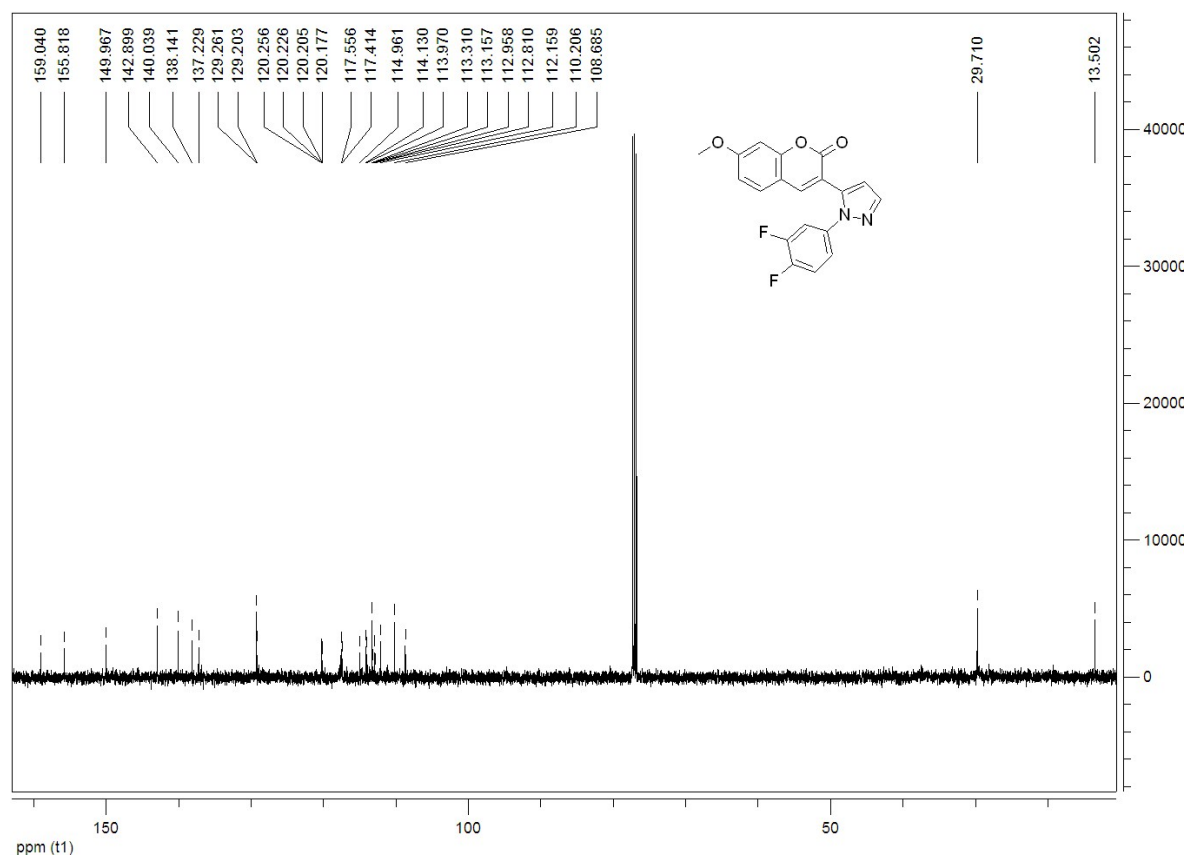

$^1\text{H}$  NMR and  $^{13}\text{C}$  NMR of compound **4m**

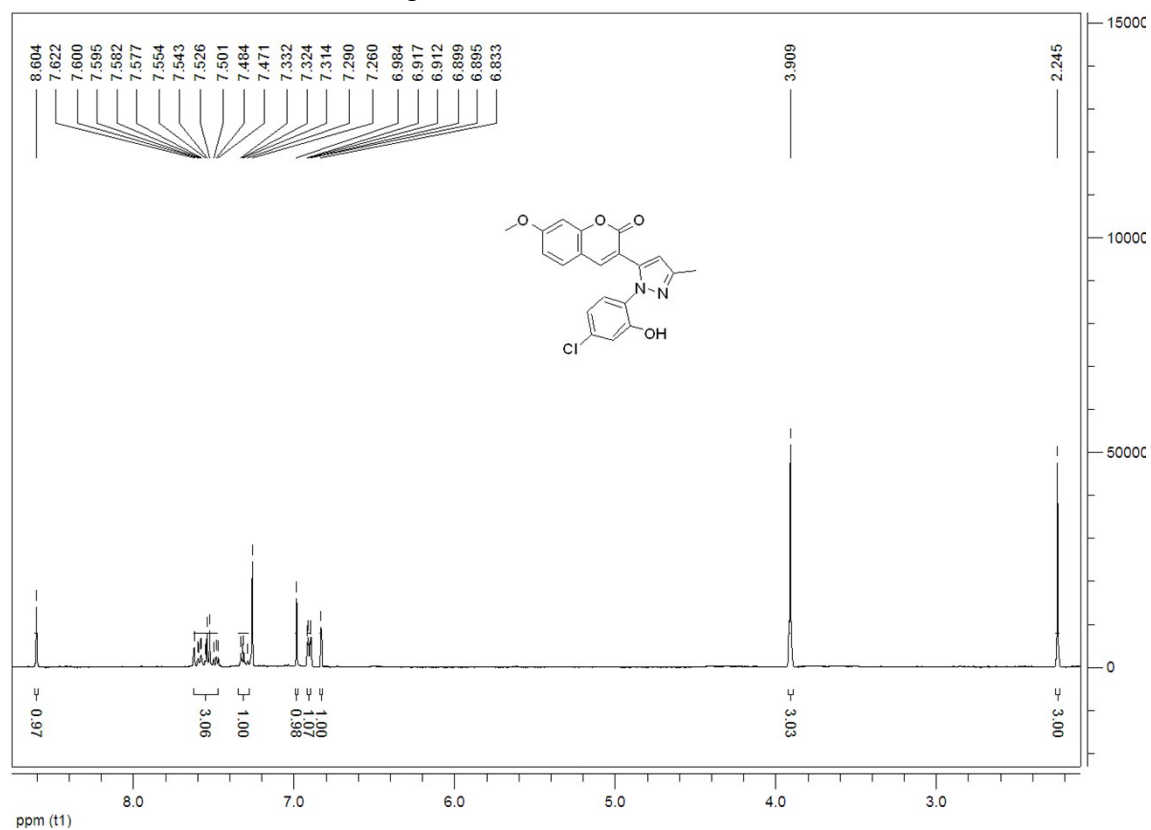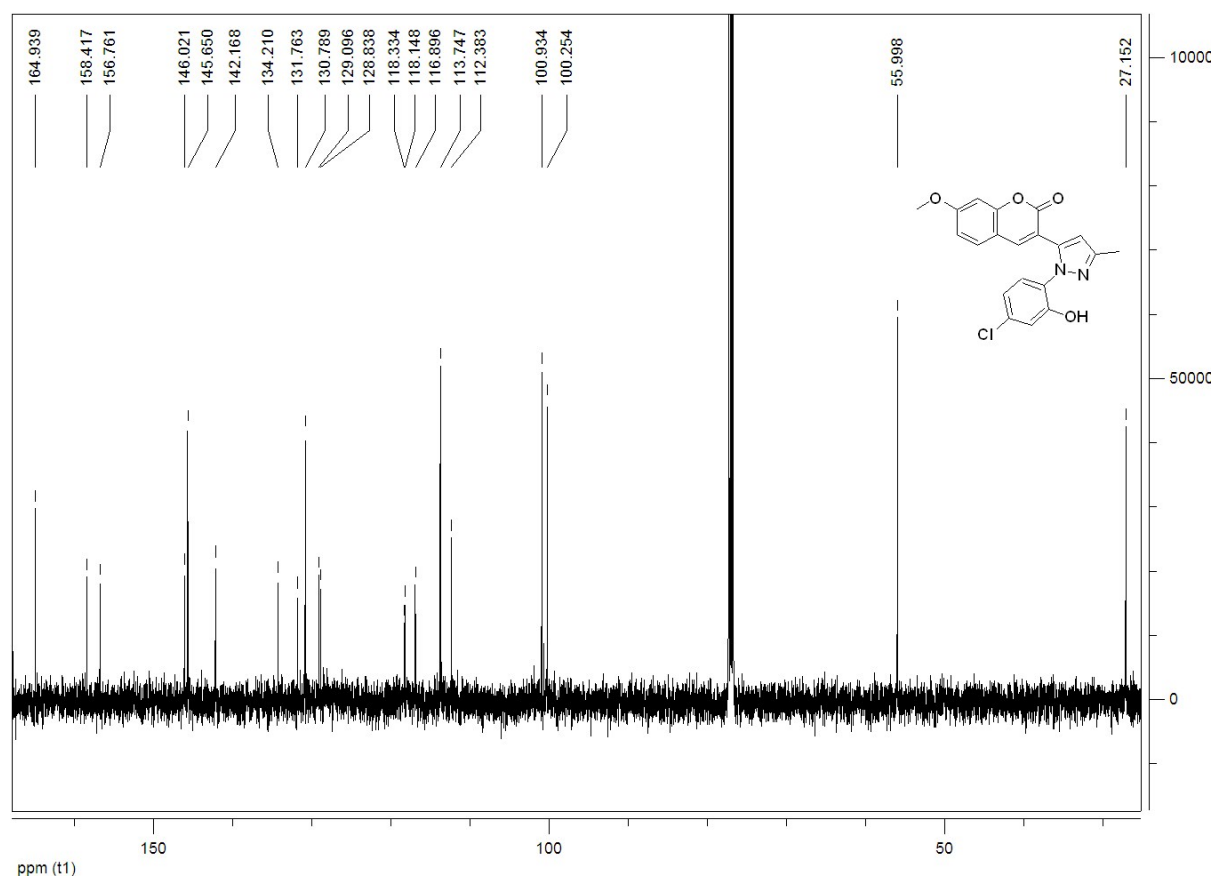

$^1\text{H}$  NMR and  $^{13}\text{C}$  NMR of compound 4n

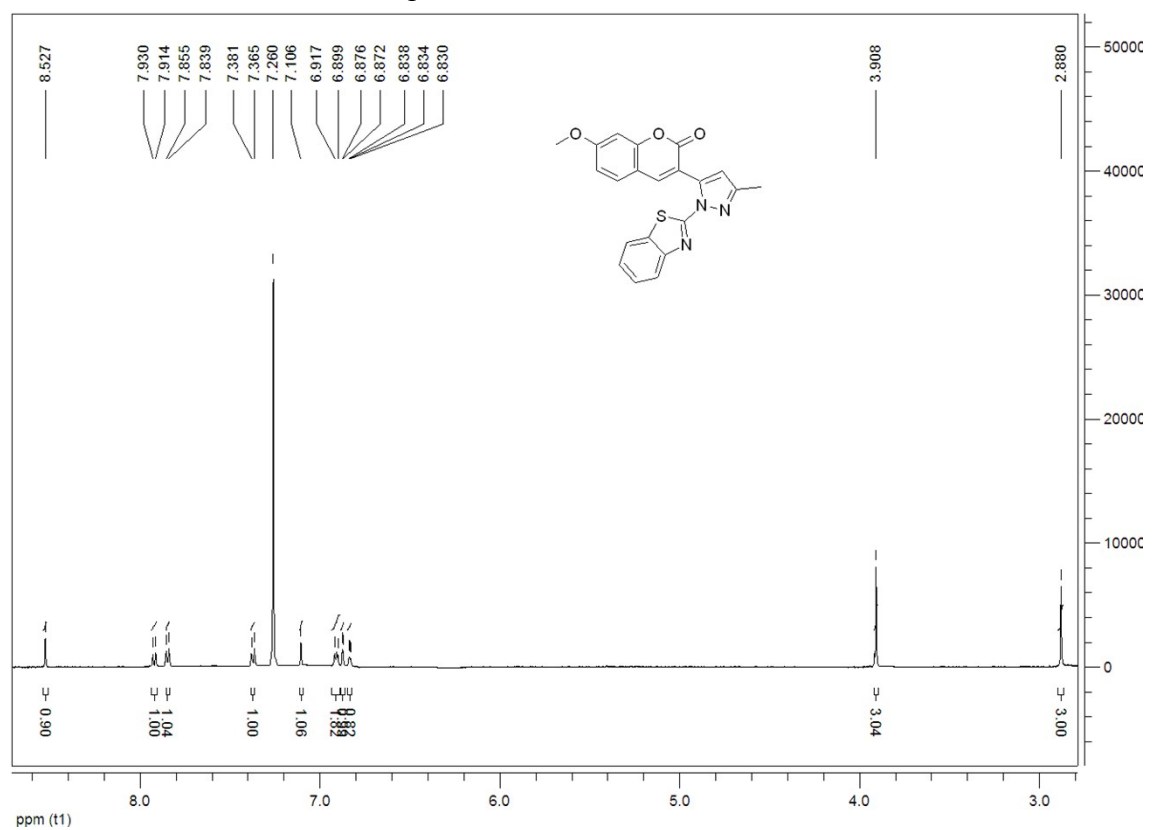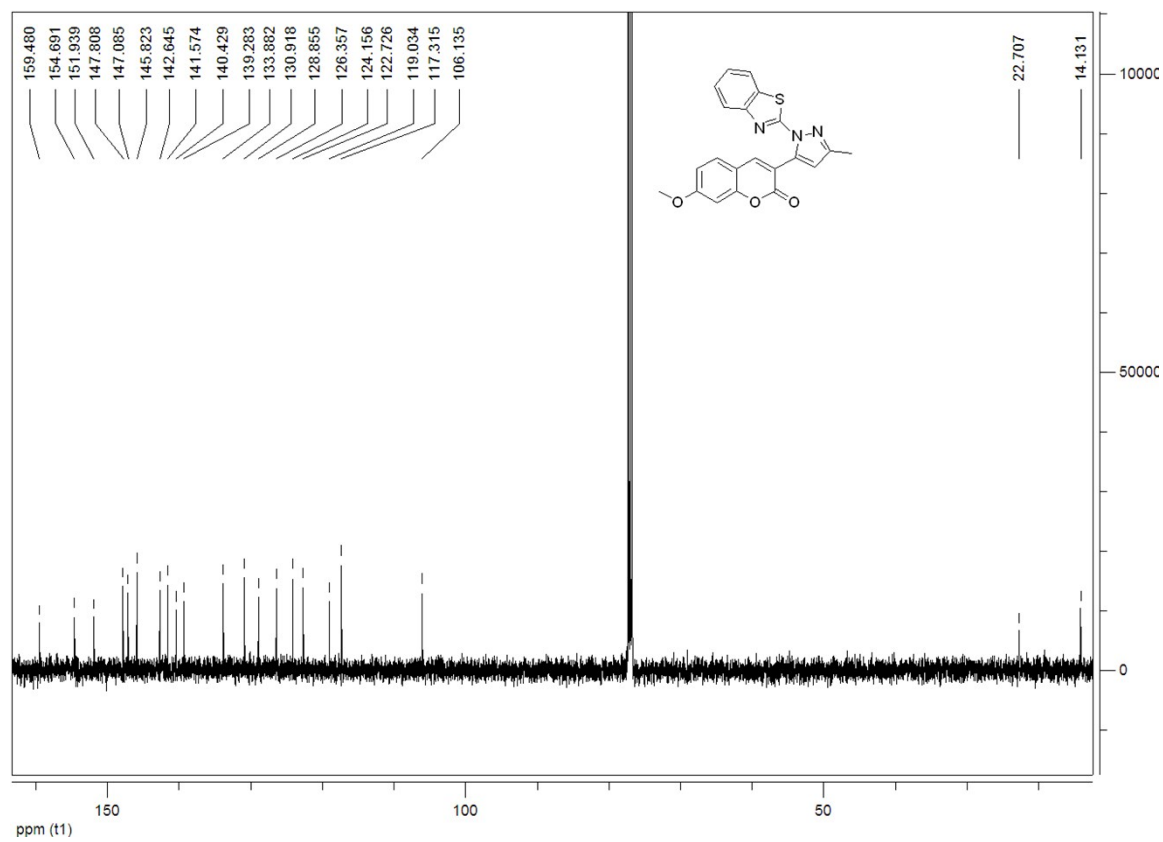

<sup>1</sup>H NMR and <sup>13</sup>C NMR of compound **4o**

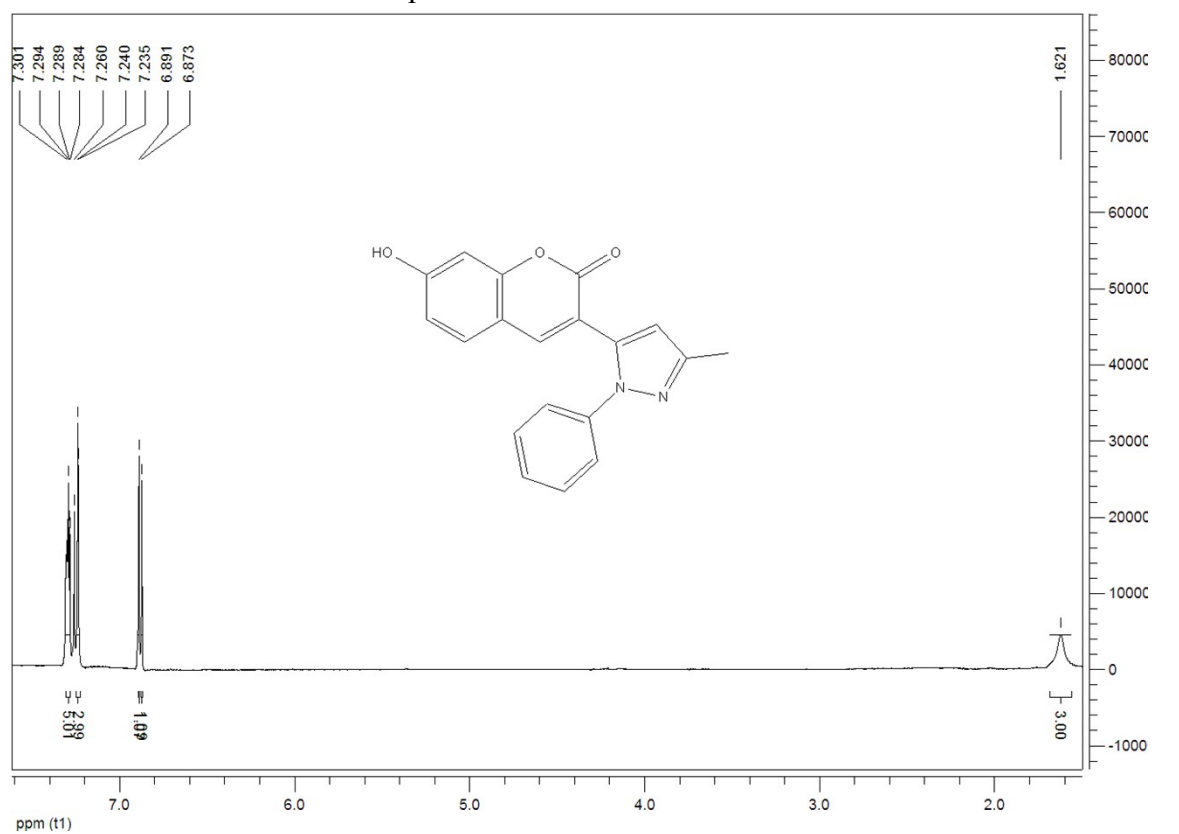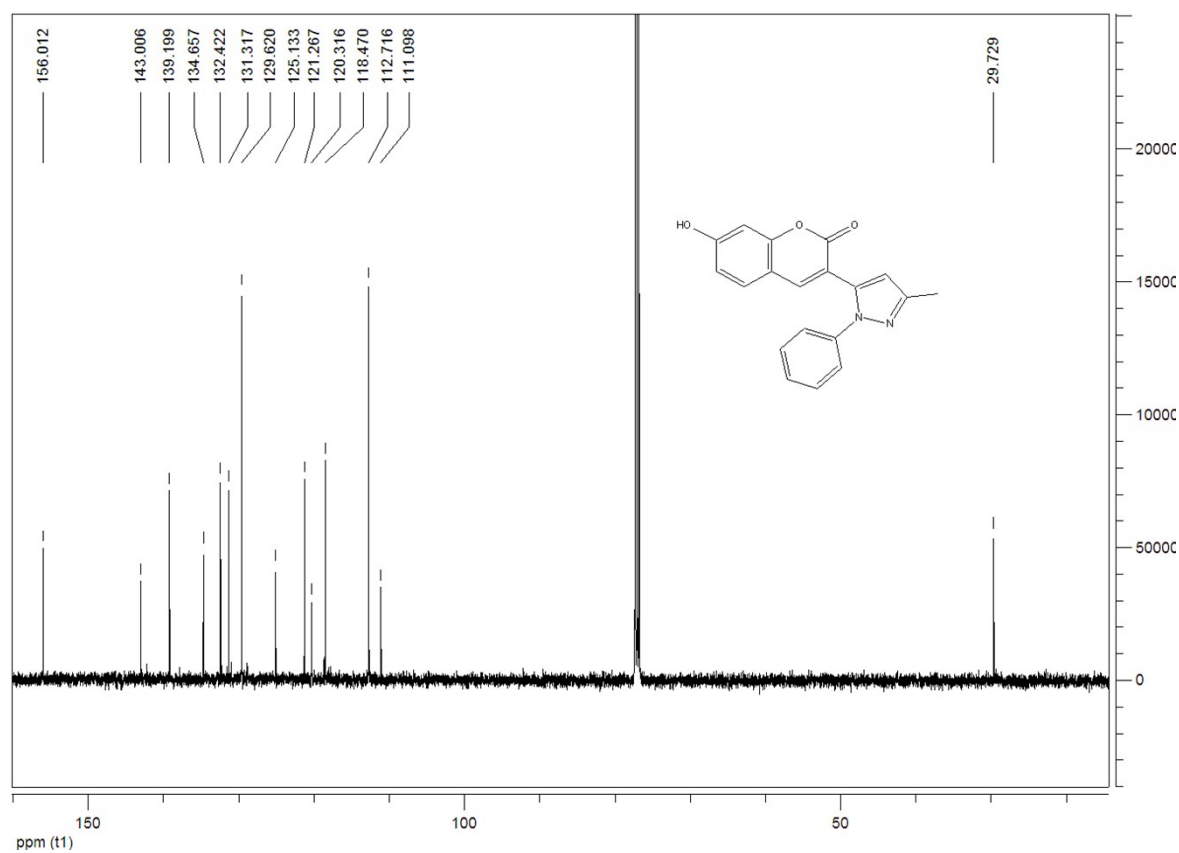



Chemical structure of compound 10: Cc1nc(NC2=CC=CC=C2)c3cc(=O)c4ccc(cc4O3)C(=O)c5ccc(cc5)[N+](=O)[O-]

<sup>1</sup>H NMR spectrum (CDCl<sub>3</sub>) of compound 10. The spectrum shows peaks from 2.384 to 7.383 ppm. The chemical structure of compound 10 is shown as an inset. The peaks are assigned as follows: aromatic protons (7.383, 7.375, 7.375, 7.365, 7.336, 7.327, 7.319, 7.308, 7.299, 7.290, 7.281, 7.260, 7.251, 7.245, 7.234, 7.229, 7.216, 7.211, 6.997, 6.991, 6.982, 6.976, 6.621 ppm), methoxy protons (3.90 ppm, integration 3.00), and methyl protons (2.384 ppm, integration 0.96). The x-axis is labeled 'ppm (t1)' and the y-axis is labeled 'Intensity'.

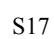

$^1\text{H}$  NMR and  $^{13}\text{C}$  NMR of compound **4q**

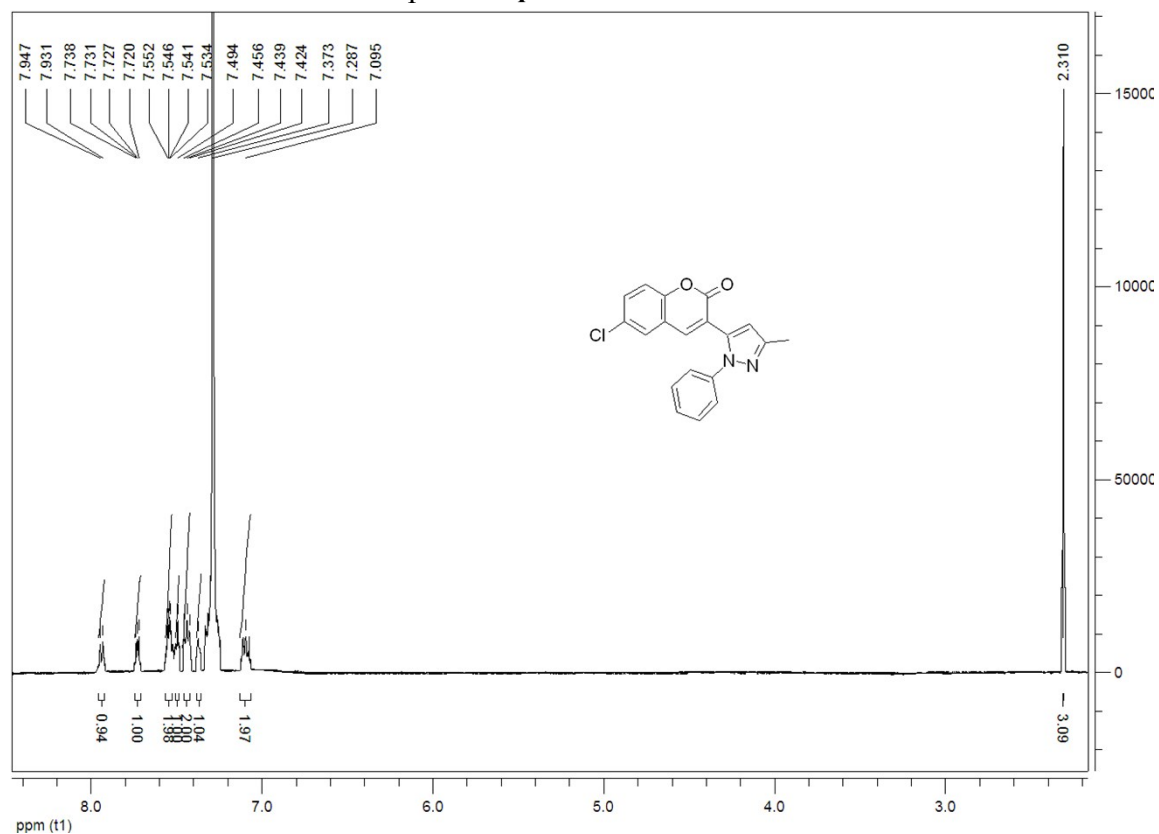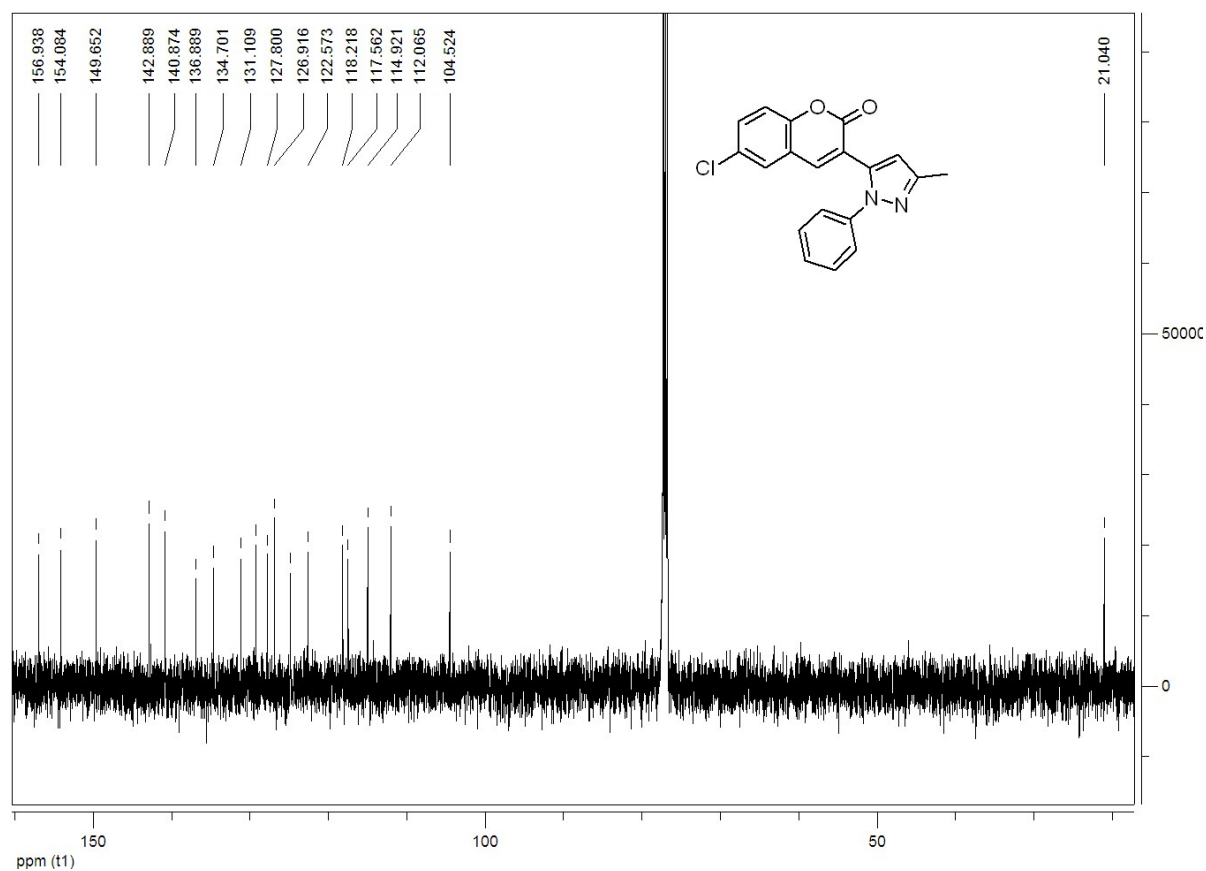

$^1\text{H}$  NMR and  $^{13}\text{C}$  NMR of compound 4r

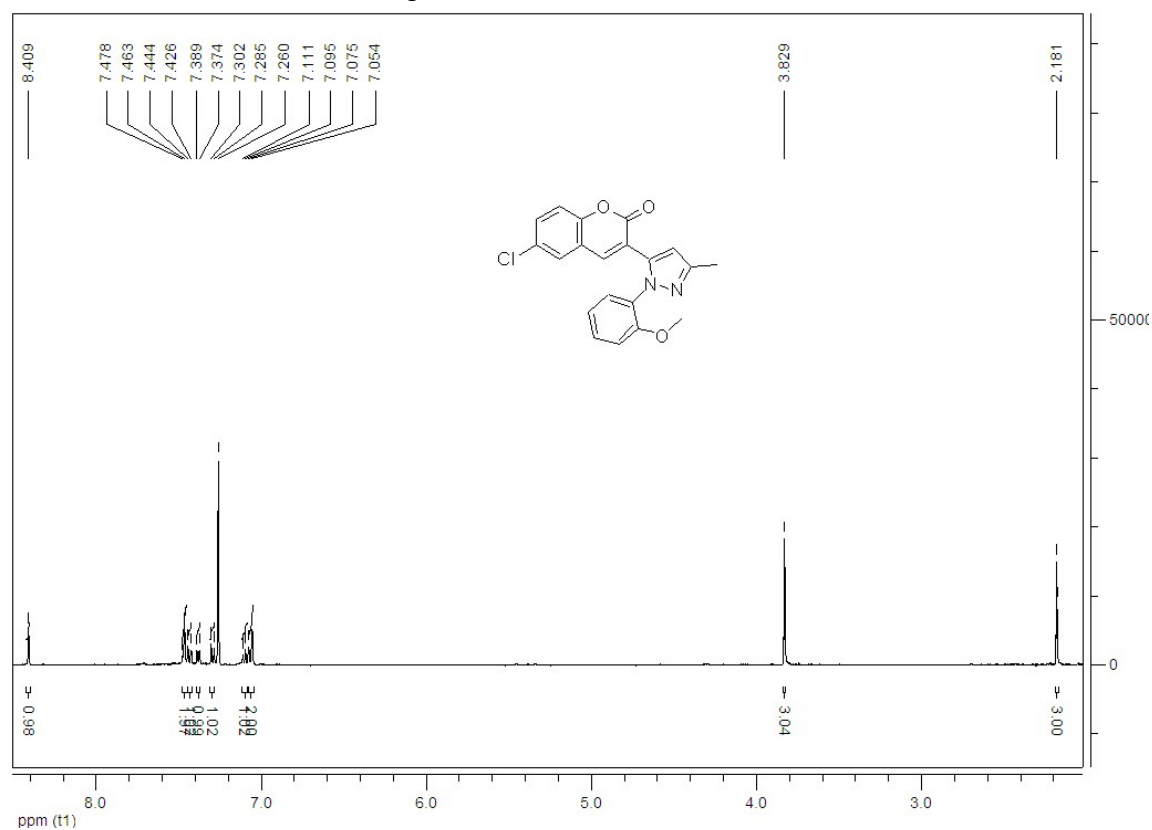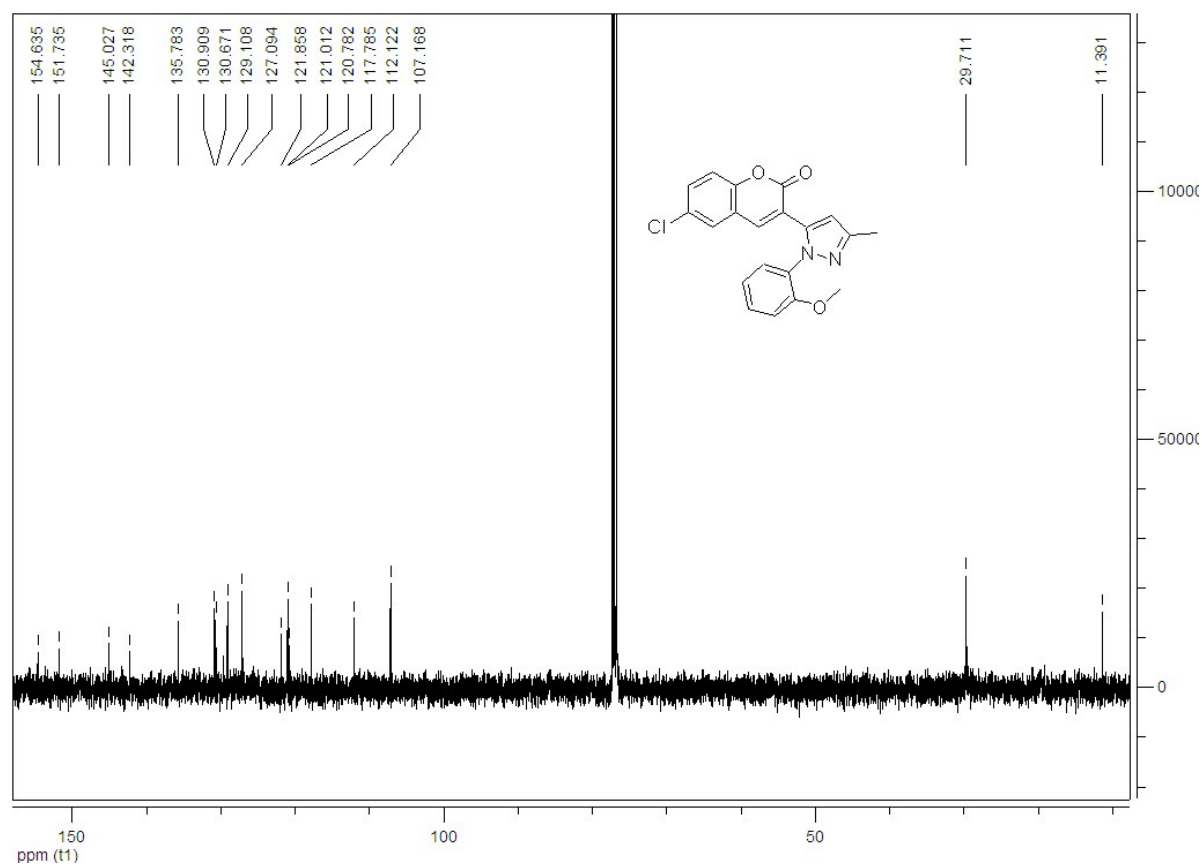

<sup>1</sup>H NMR and <sup>13</sup>C NMR of compound 4s

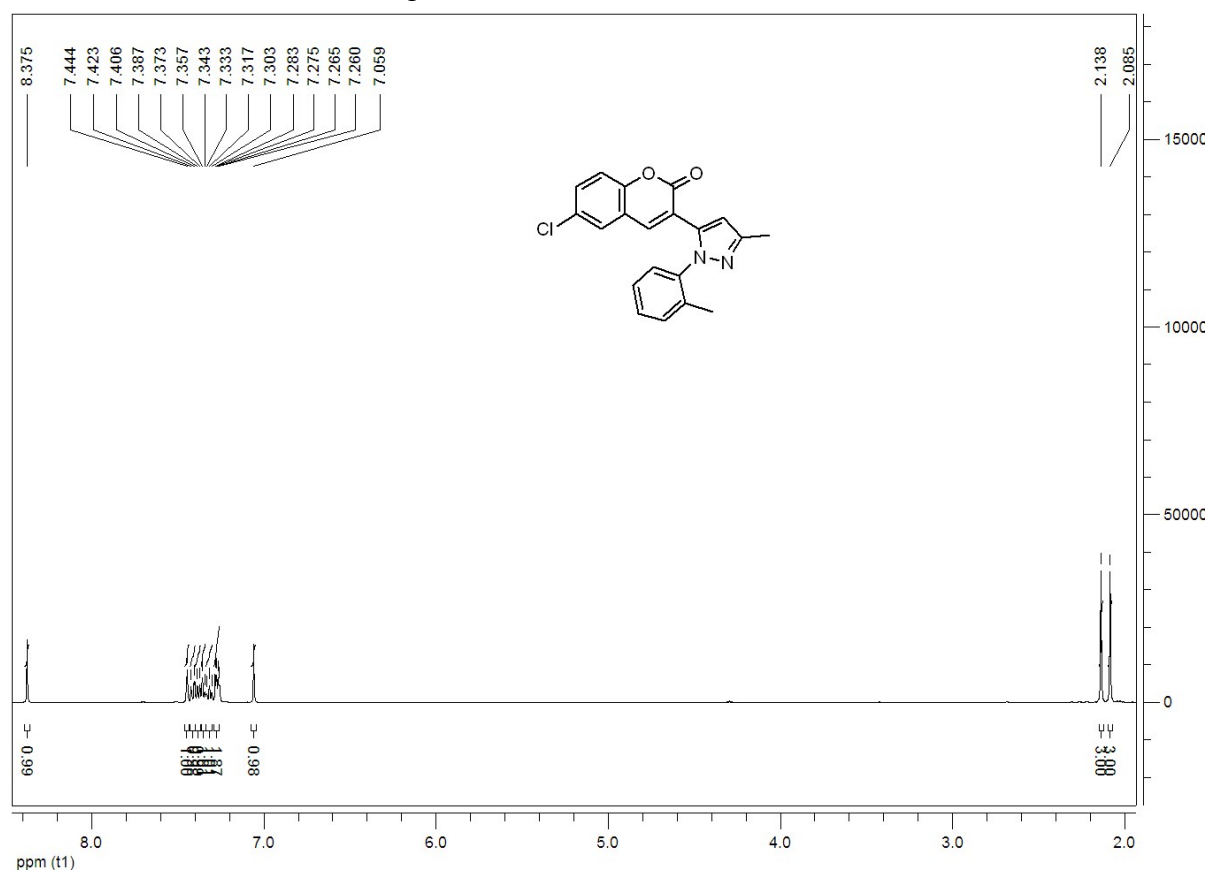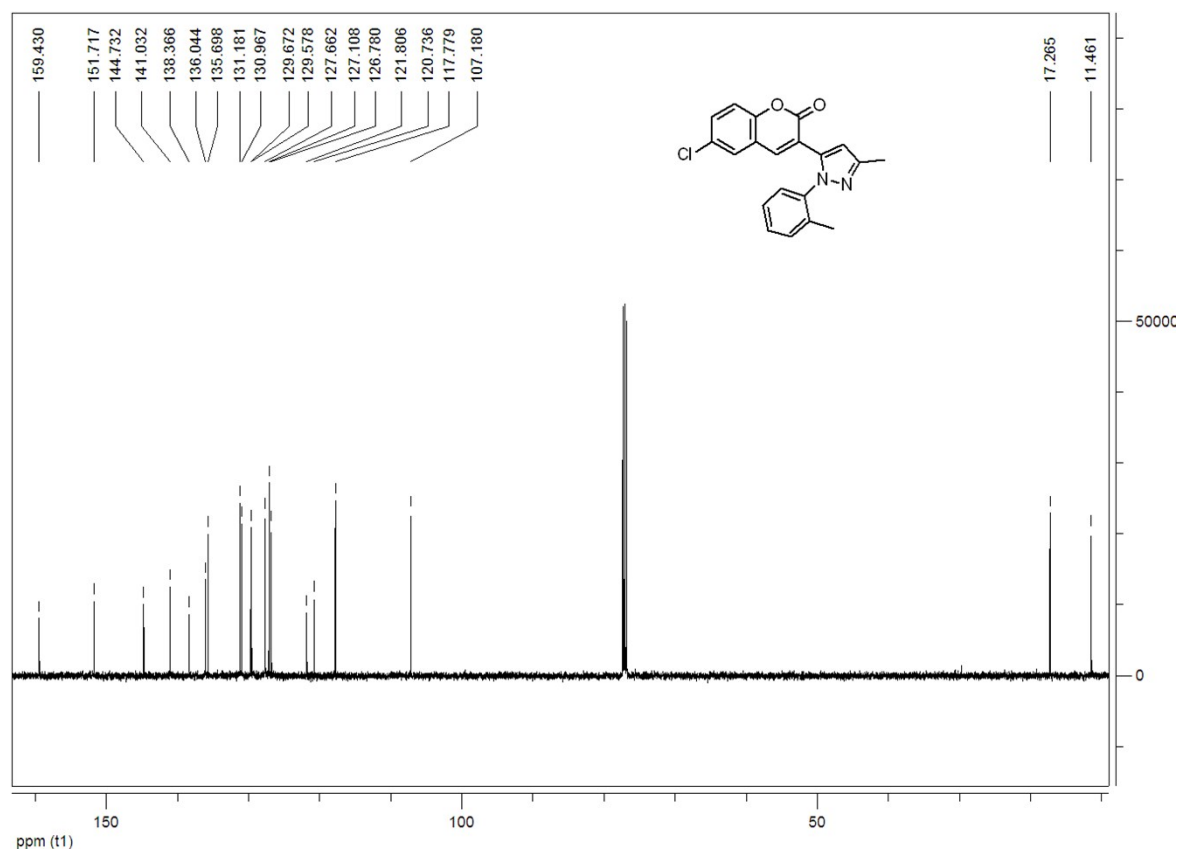

$^1\text{H}$  NMR and  $^{13}\text{C}$  NMR of compound 4t

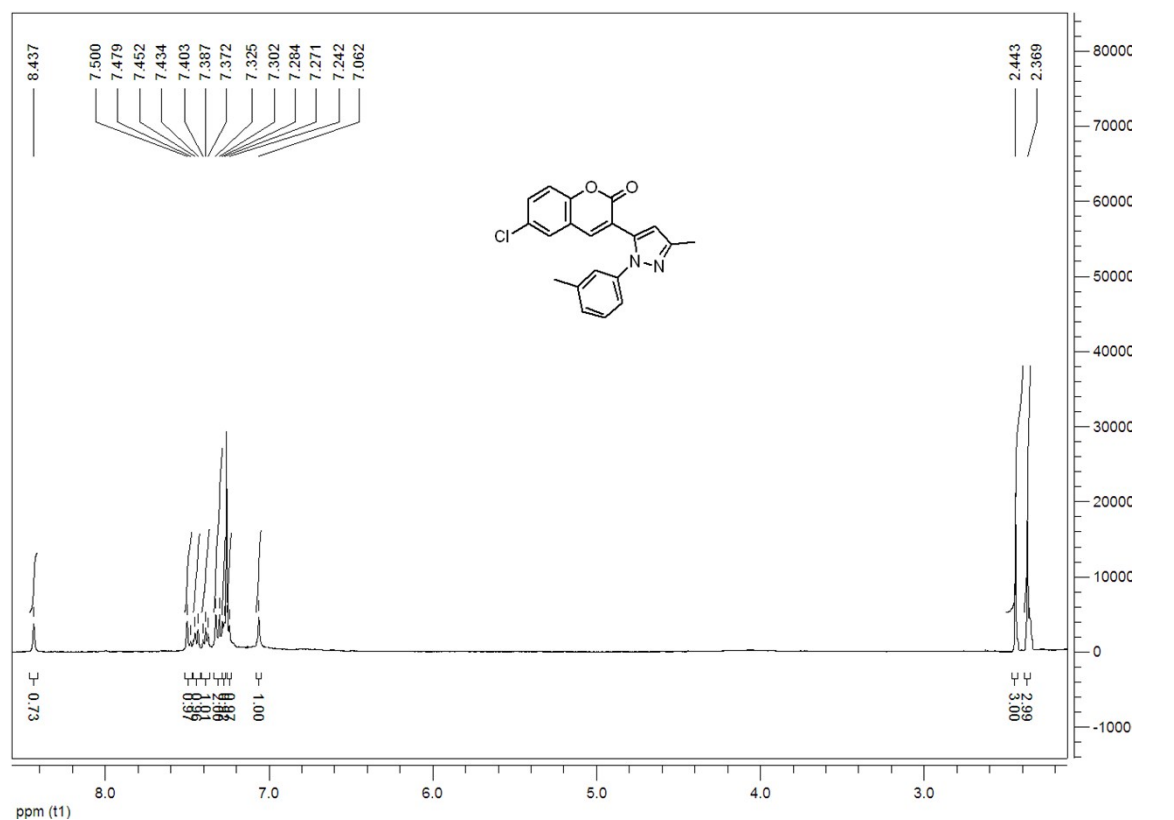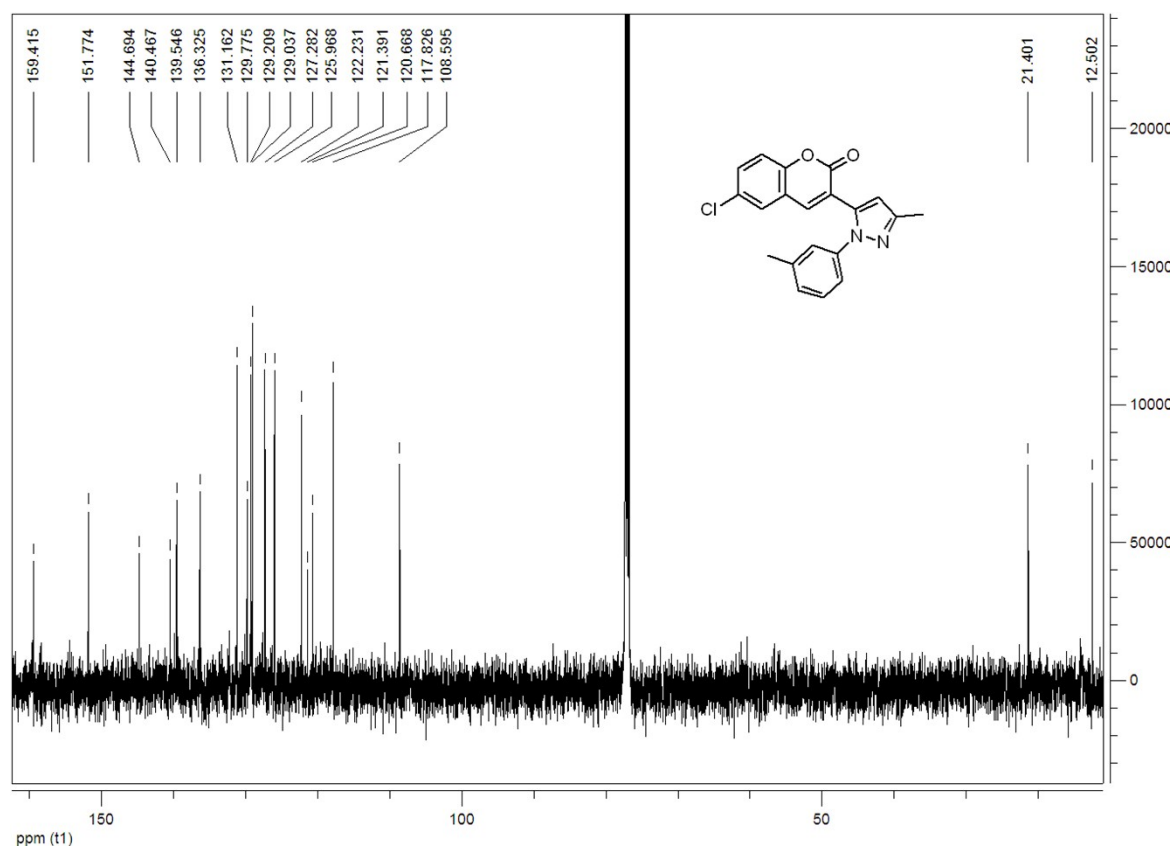

$^1\text{H}$  NMR and  $^{13}\text{C}$  NMR of compound **4u**

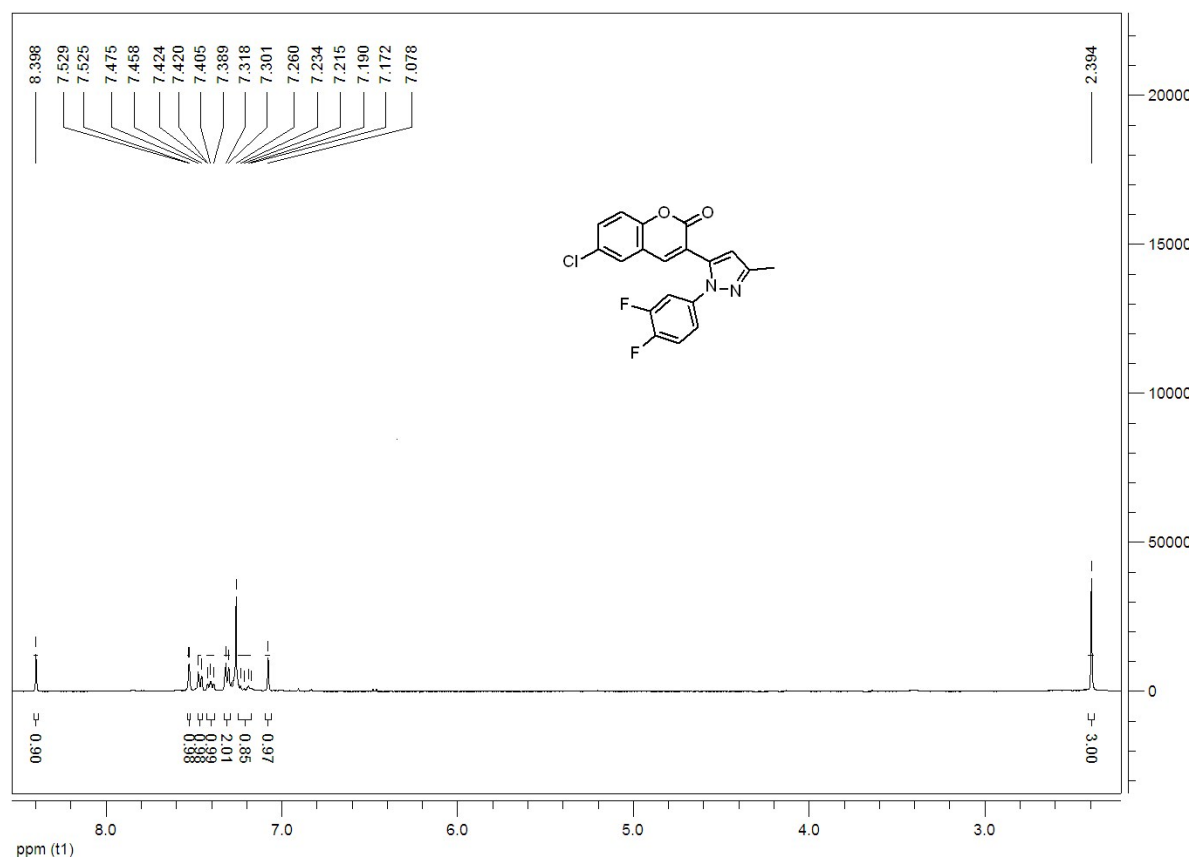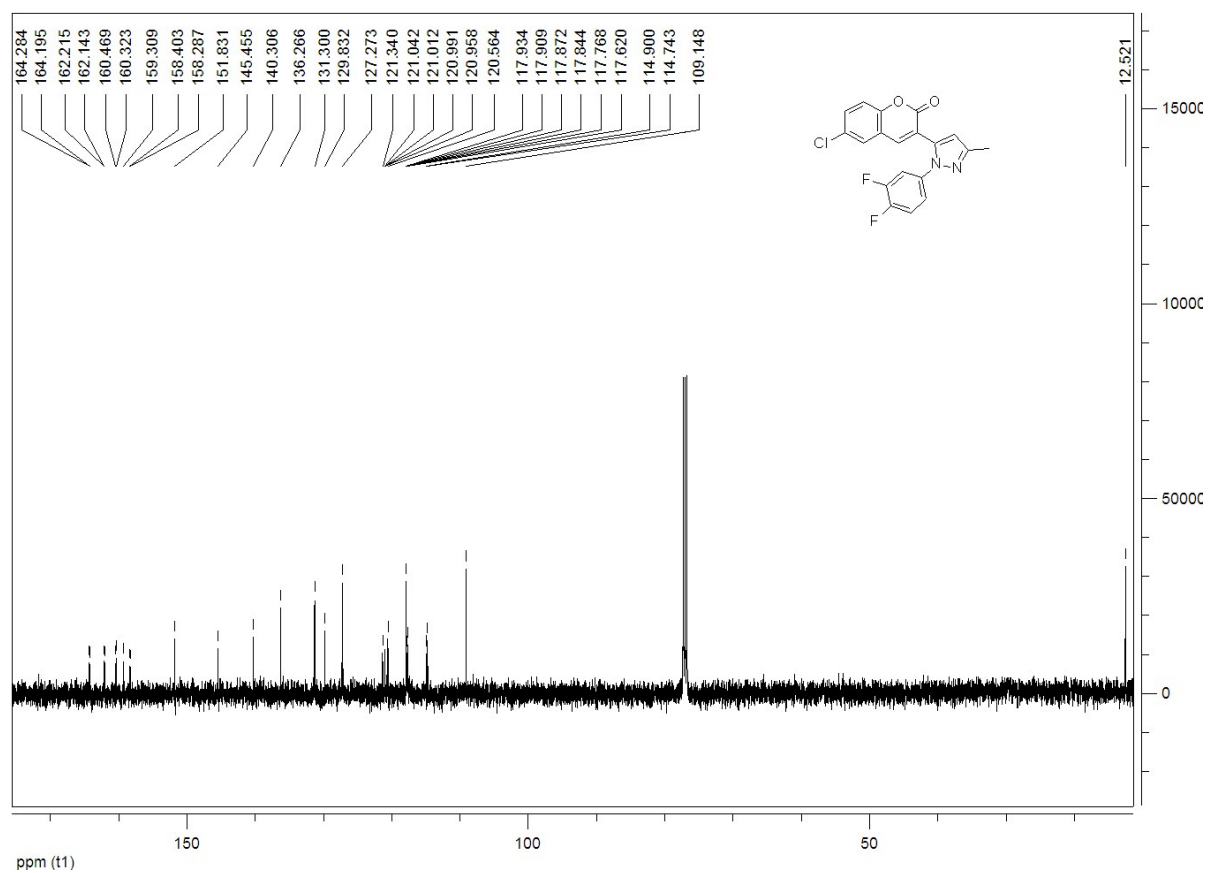

$^1\text{H}$  NMR and  $^{13}\text{C}$  NMR of compound 4v

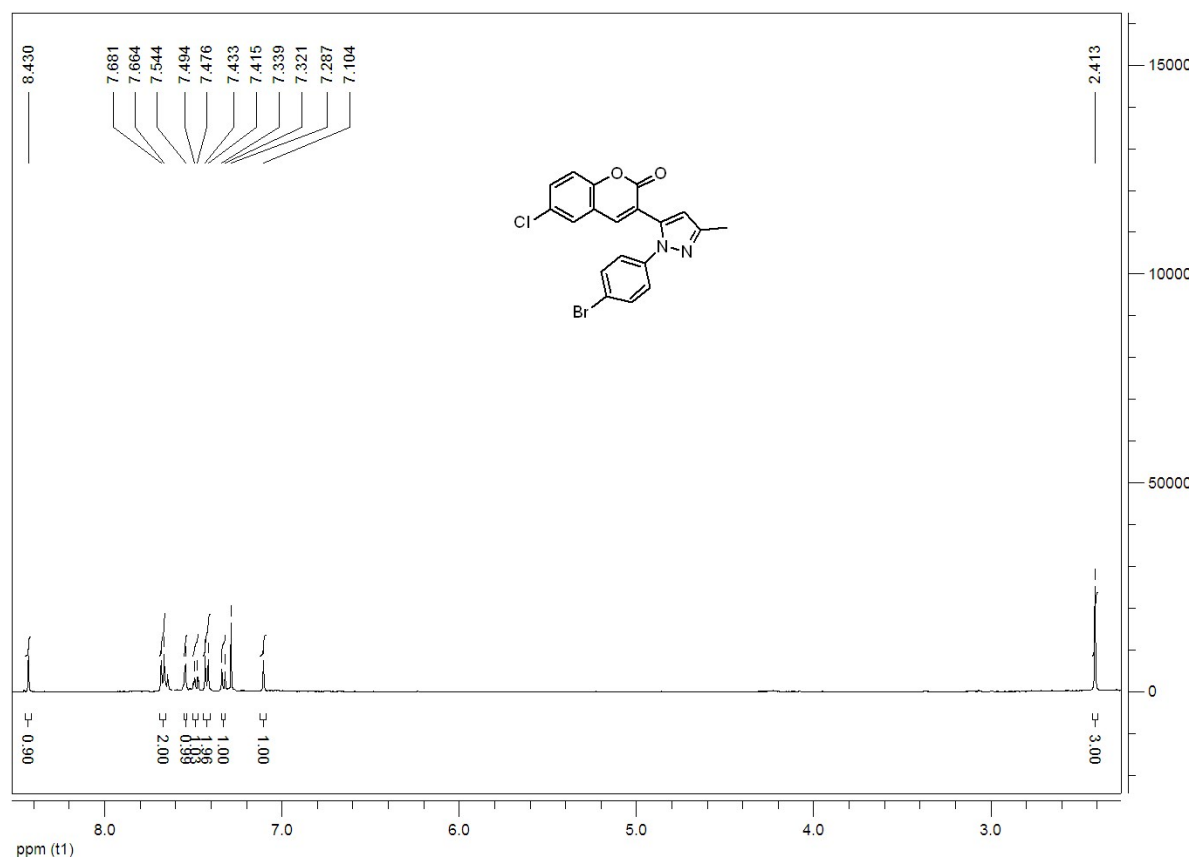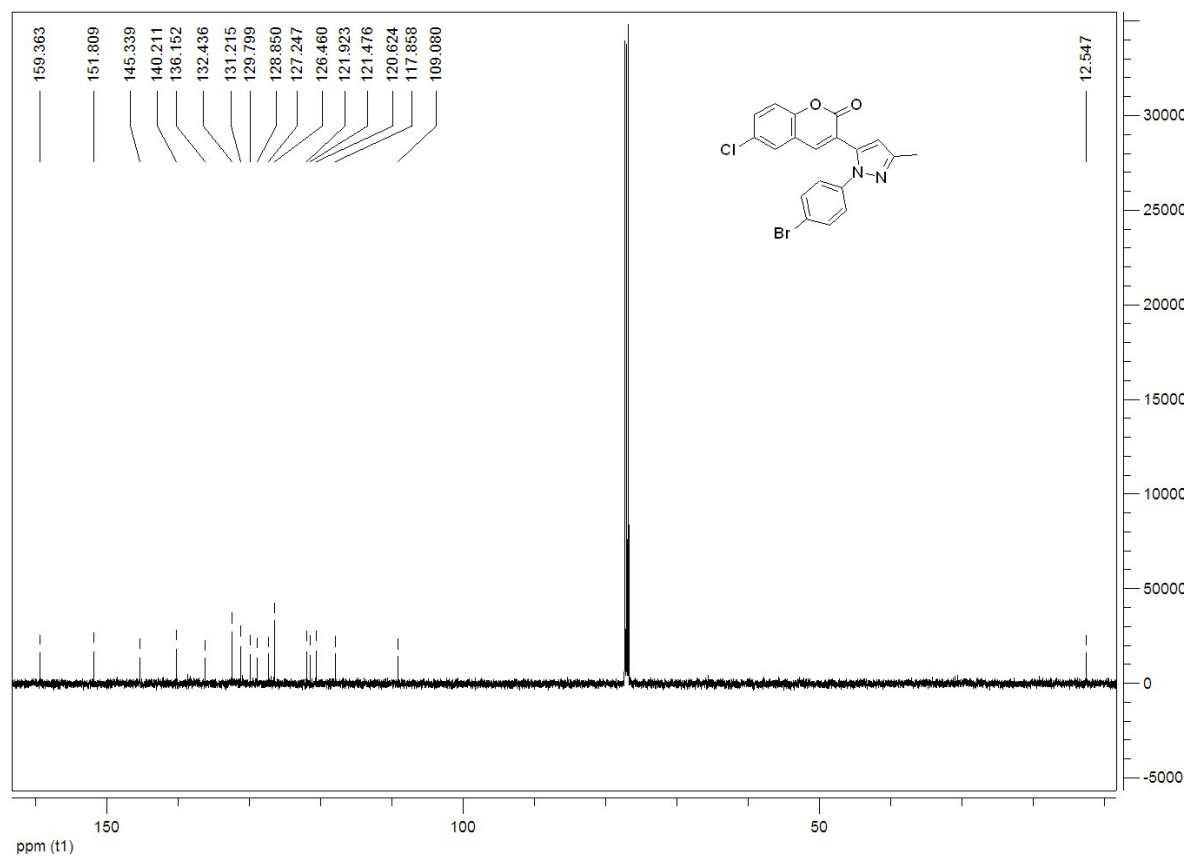

$^1\text{H}$  NMR and  $^{13}\text{C}$  NMR of compound **4w**

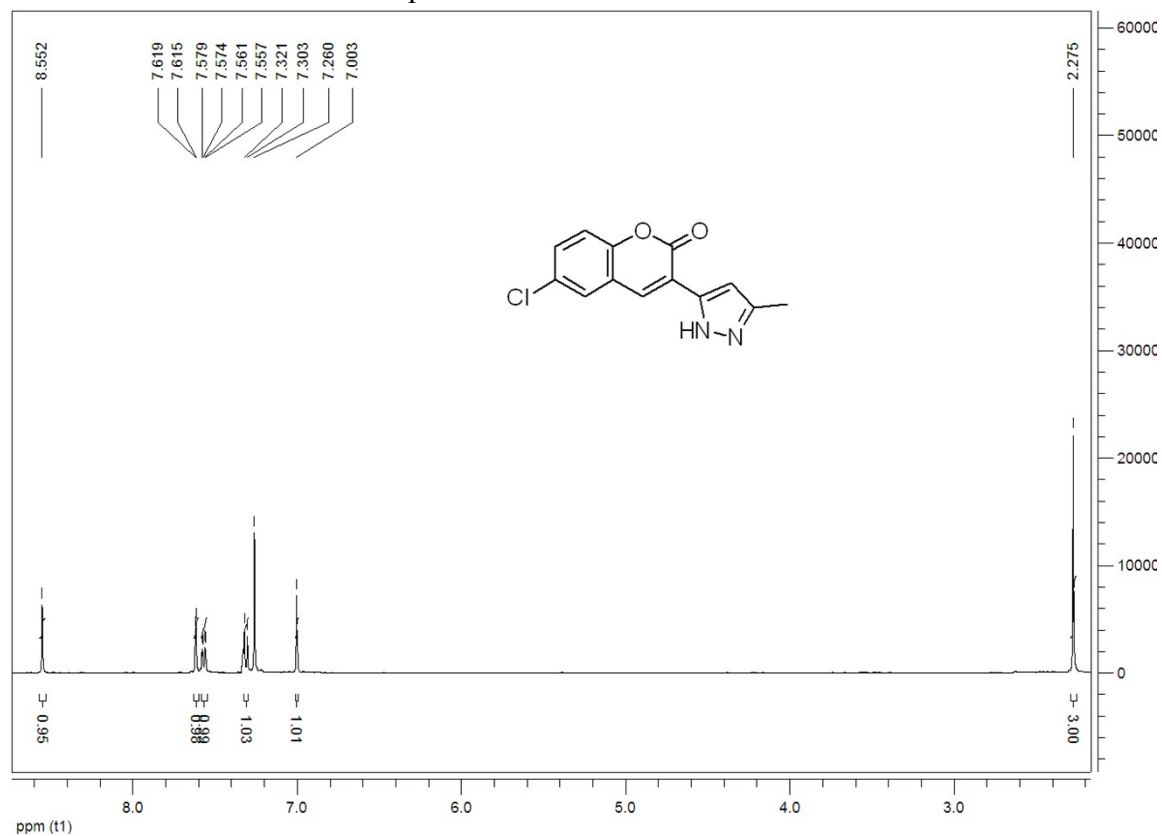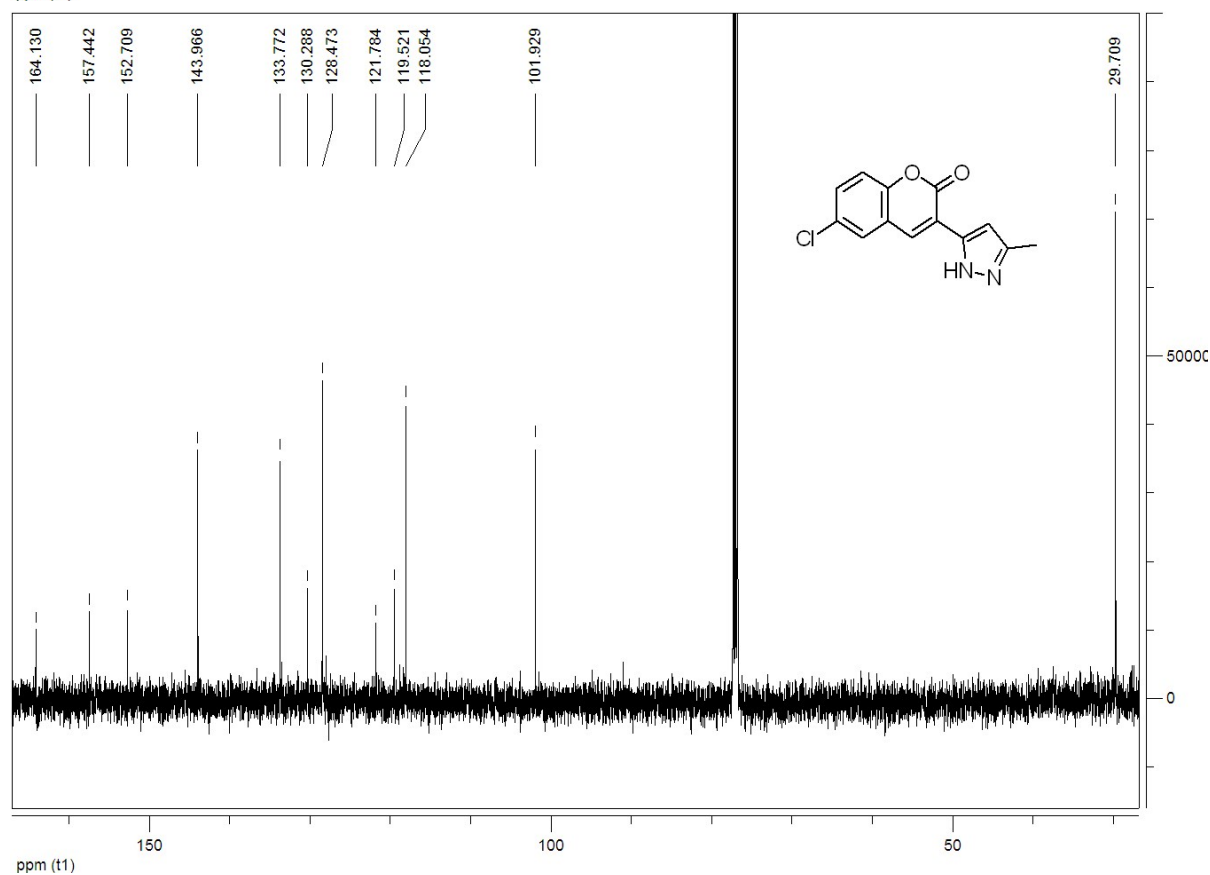



$^1\text{H}$  NMR and  $^{13}\text{C}$  NMR of compound 4x

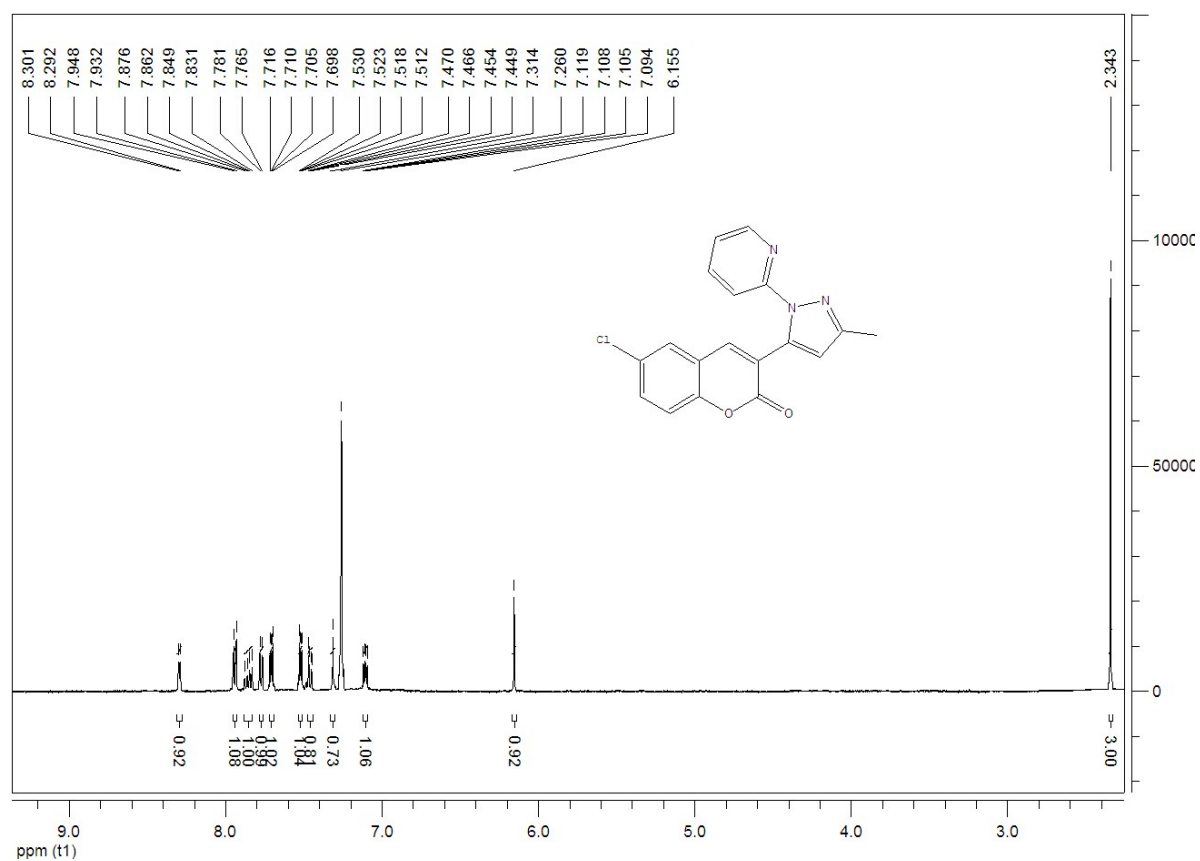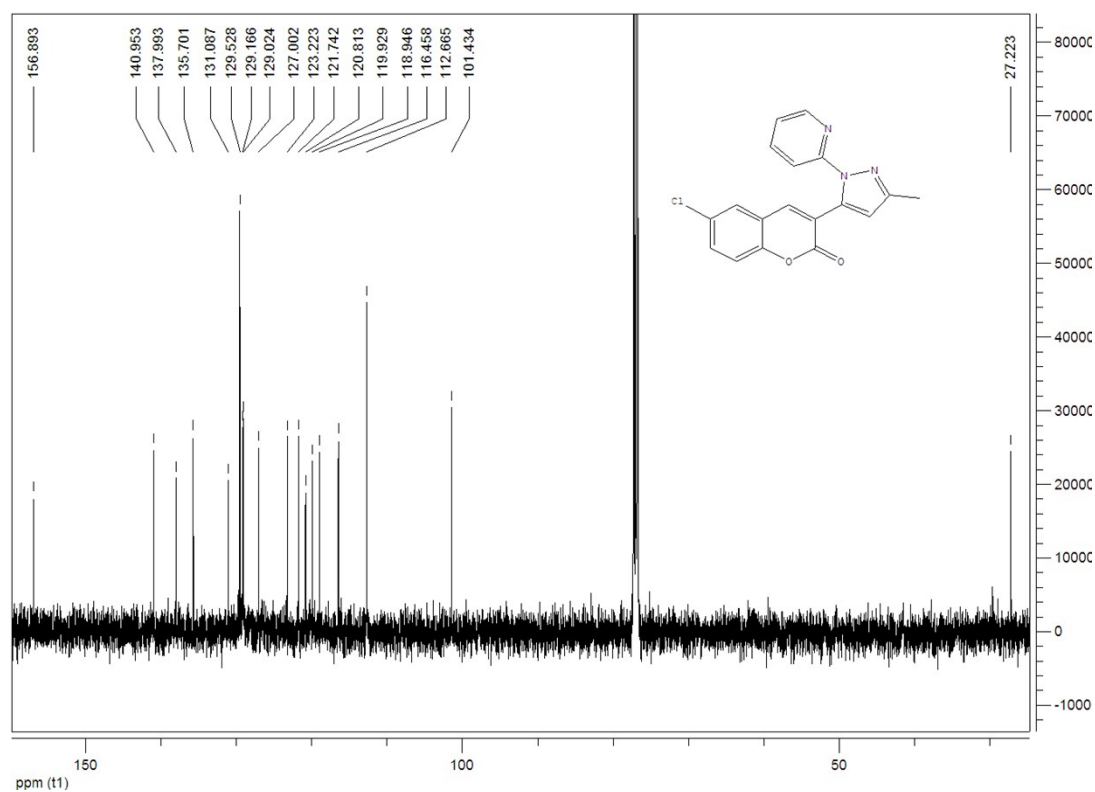

$^1\text{H}$  NMR and  $^{13}\text{C}$  NMR of compound 4y

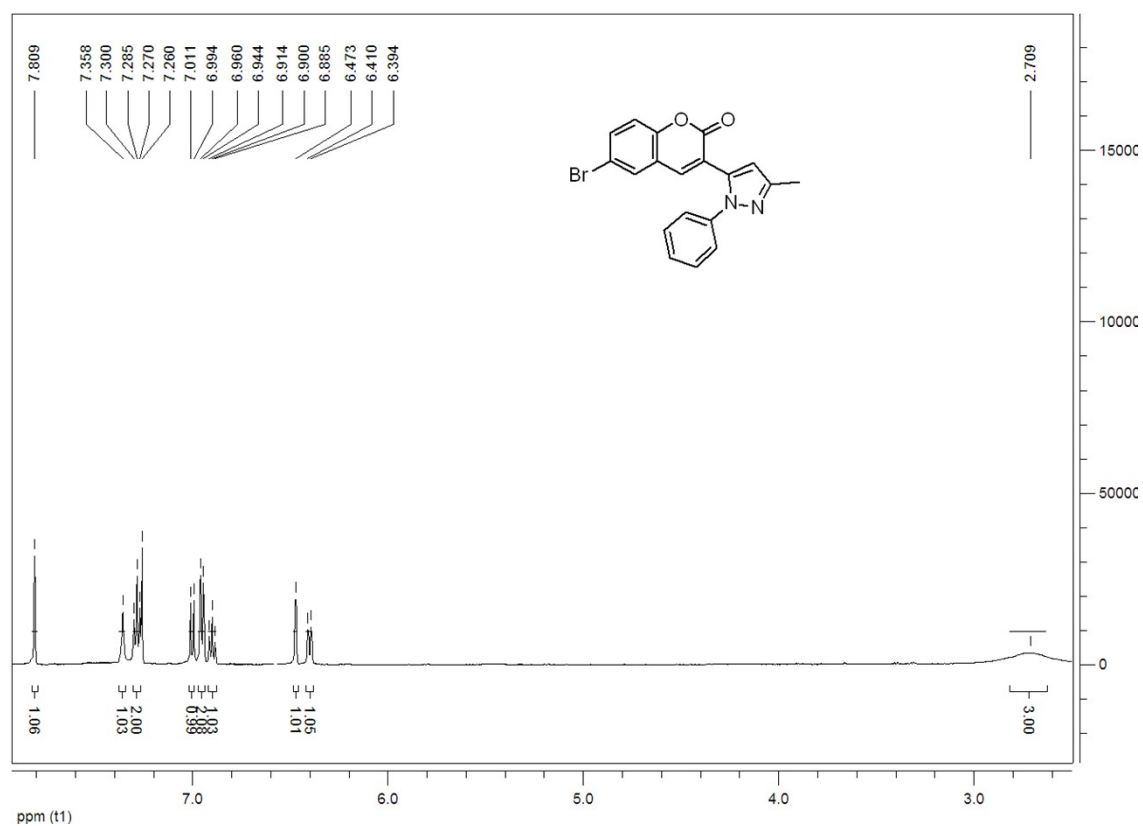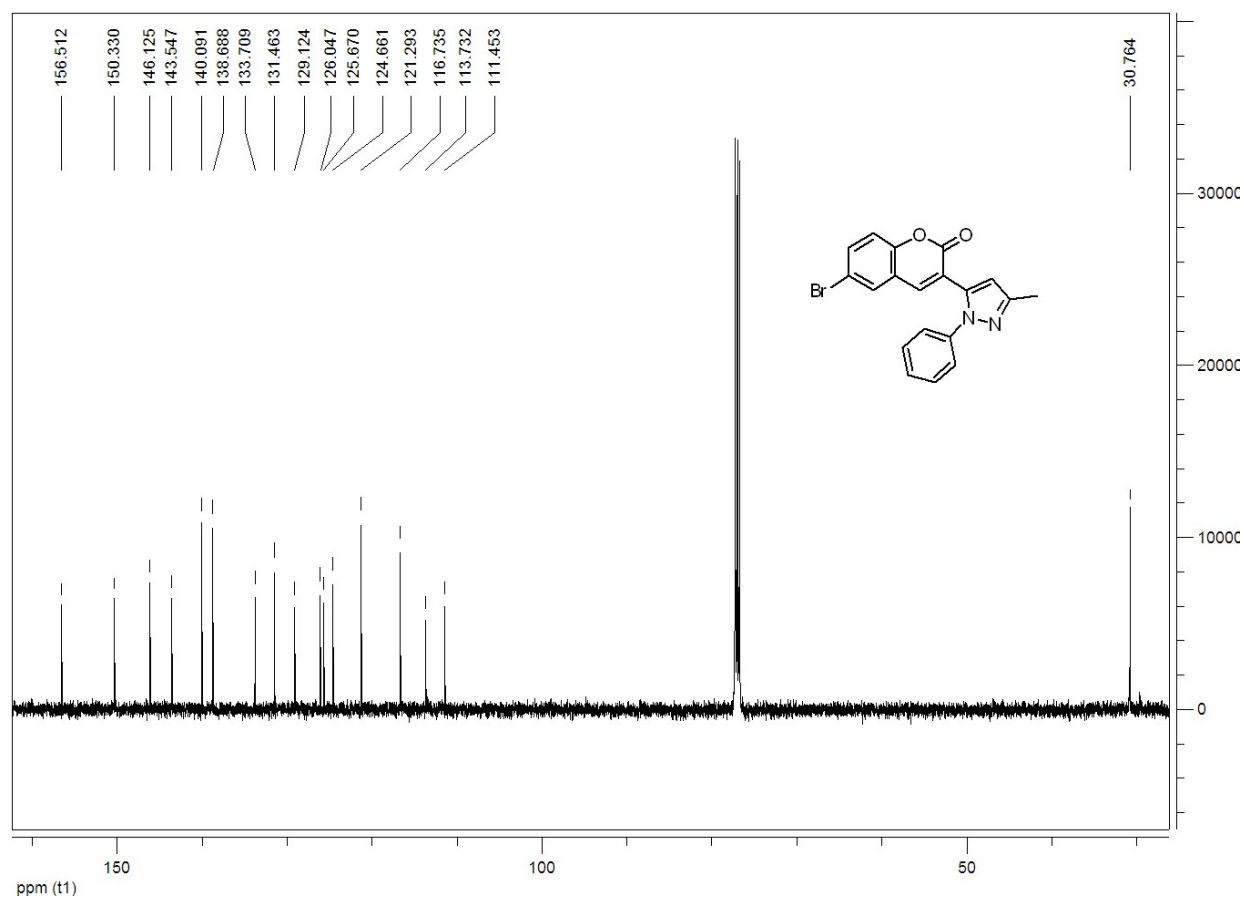

$^1\text{H}$  NMR and  $^{13}\text{C}$  NMR of compound **4z**

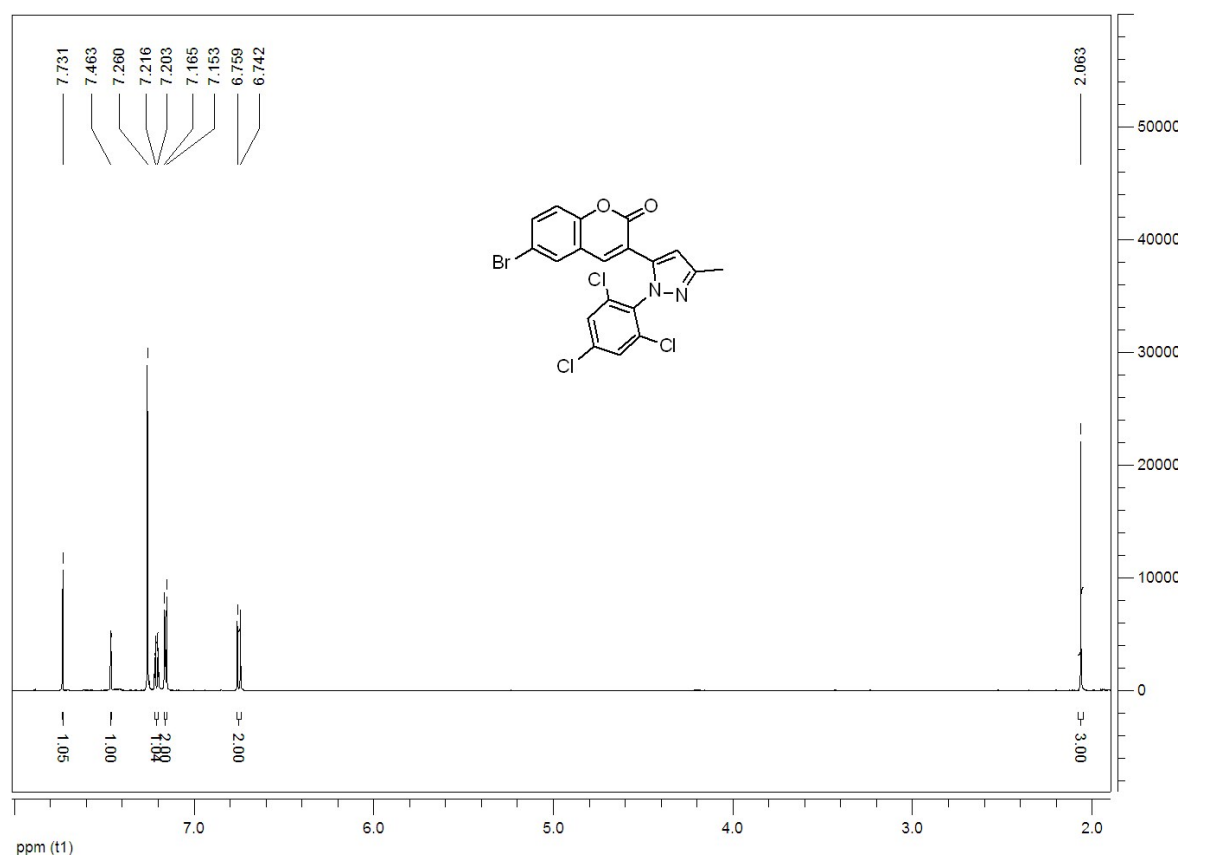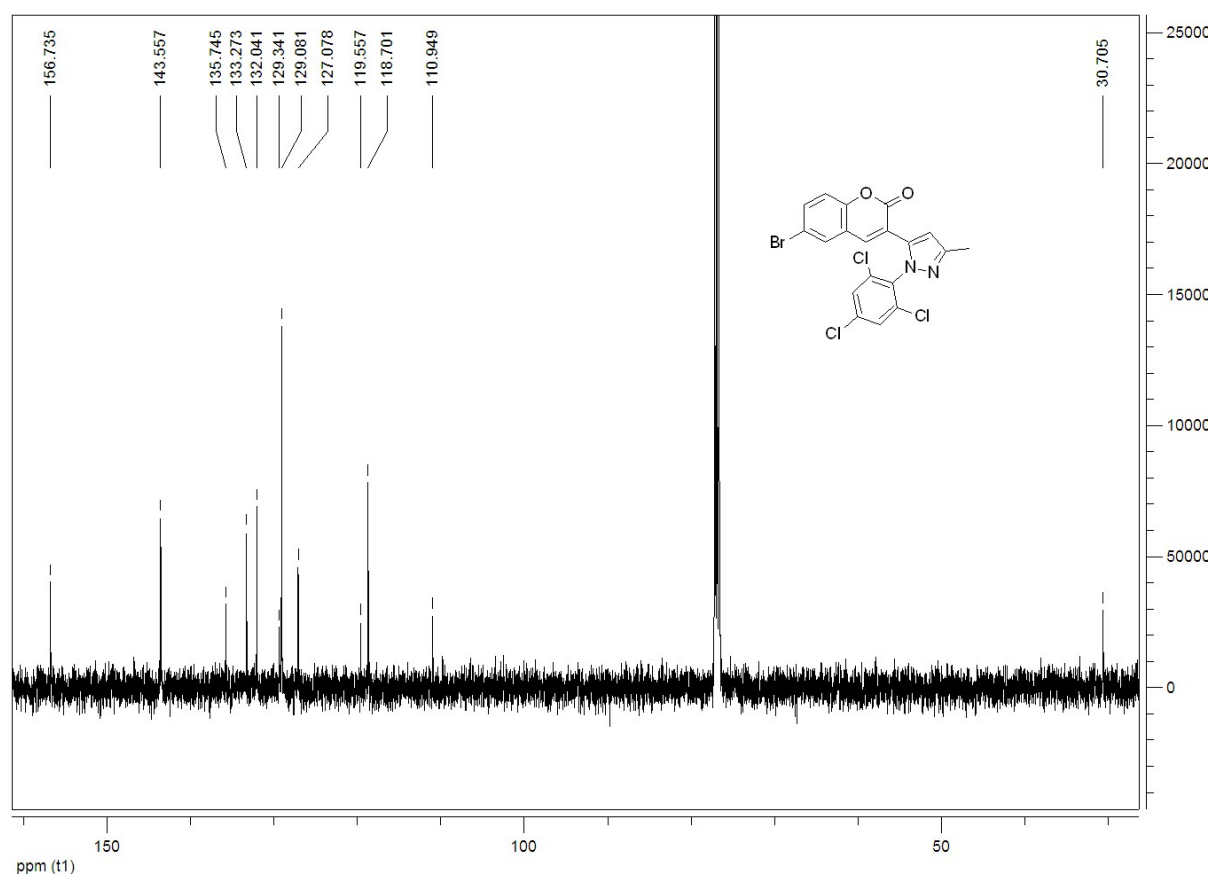

$^1\text{H}$  NMR and  $^{13}\text{C}$  NMR of compound **4aa**

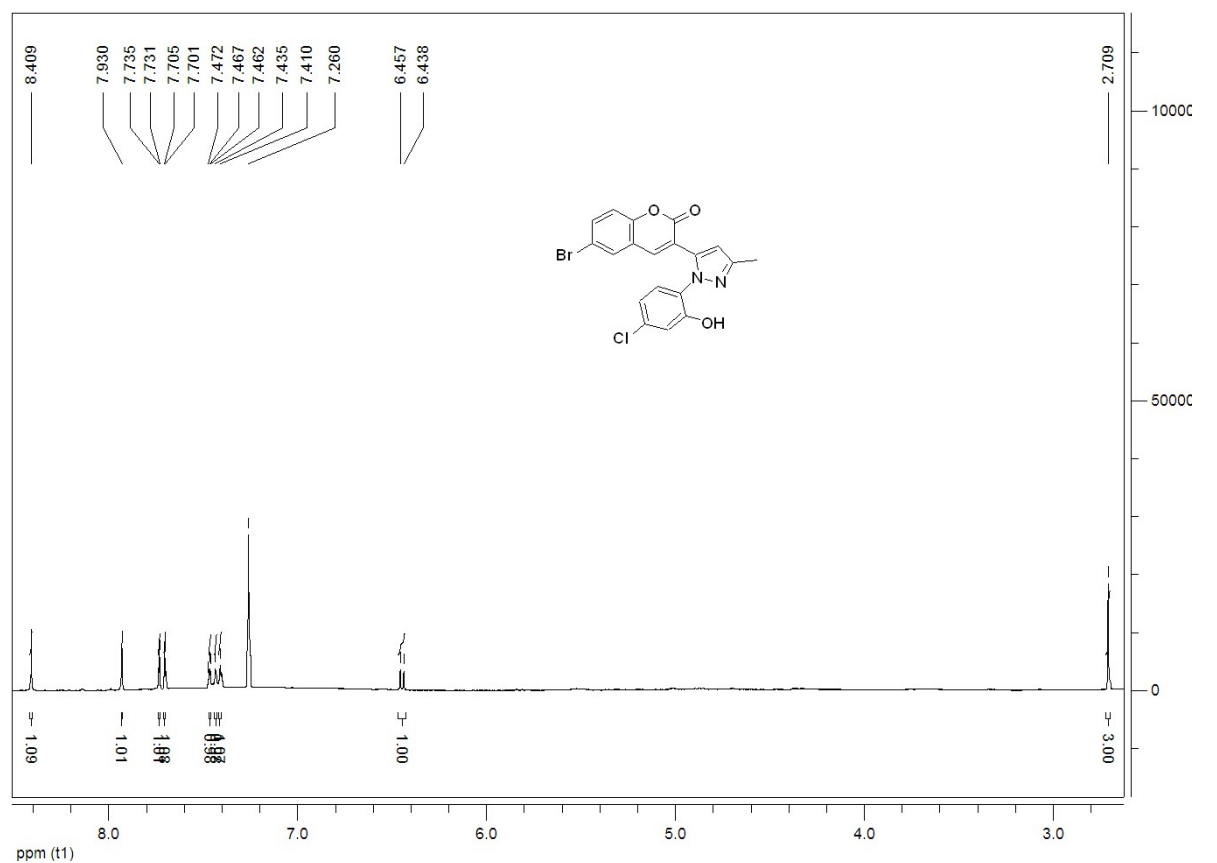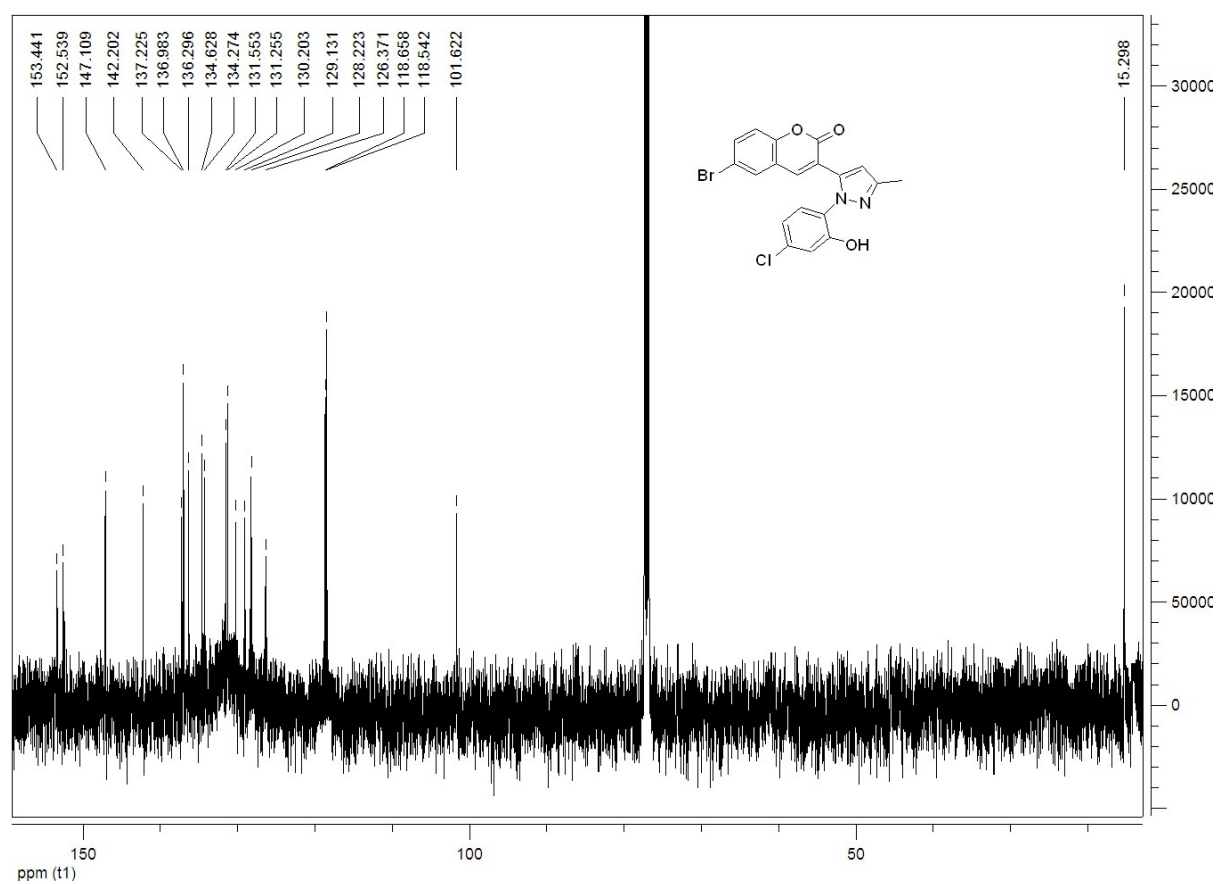

<sup>1</sup>H NMR and <sup>13</sup>C NMR of compound **4ab**

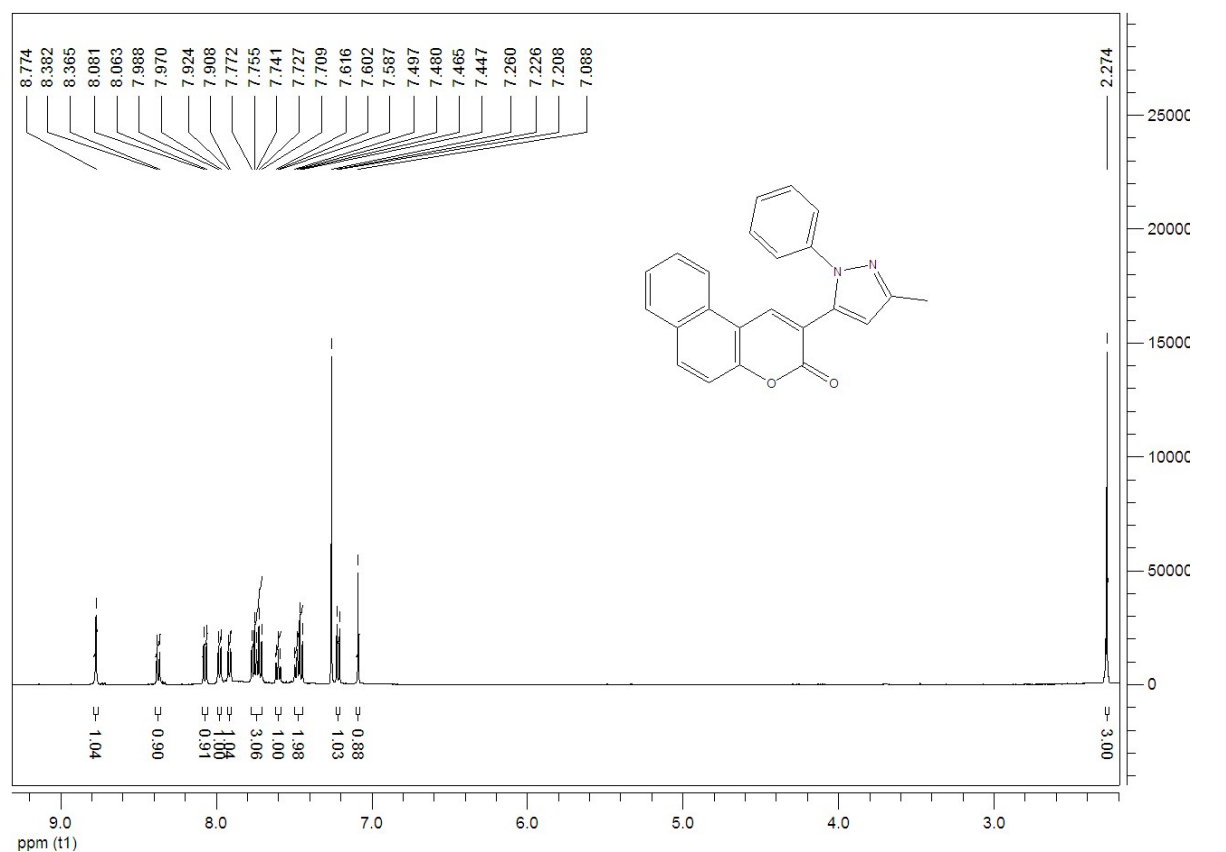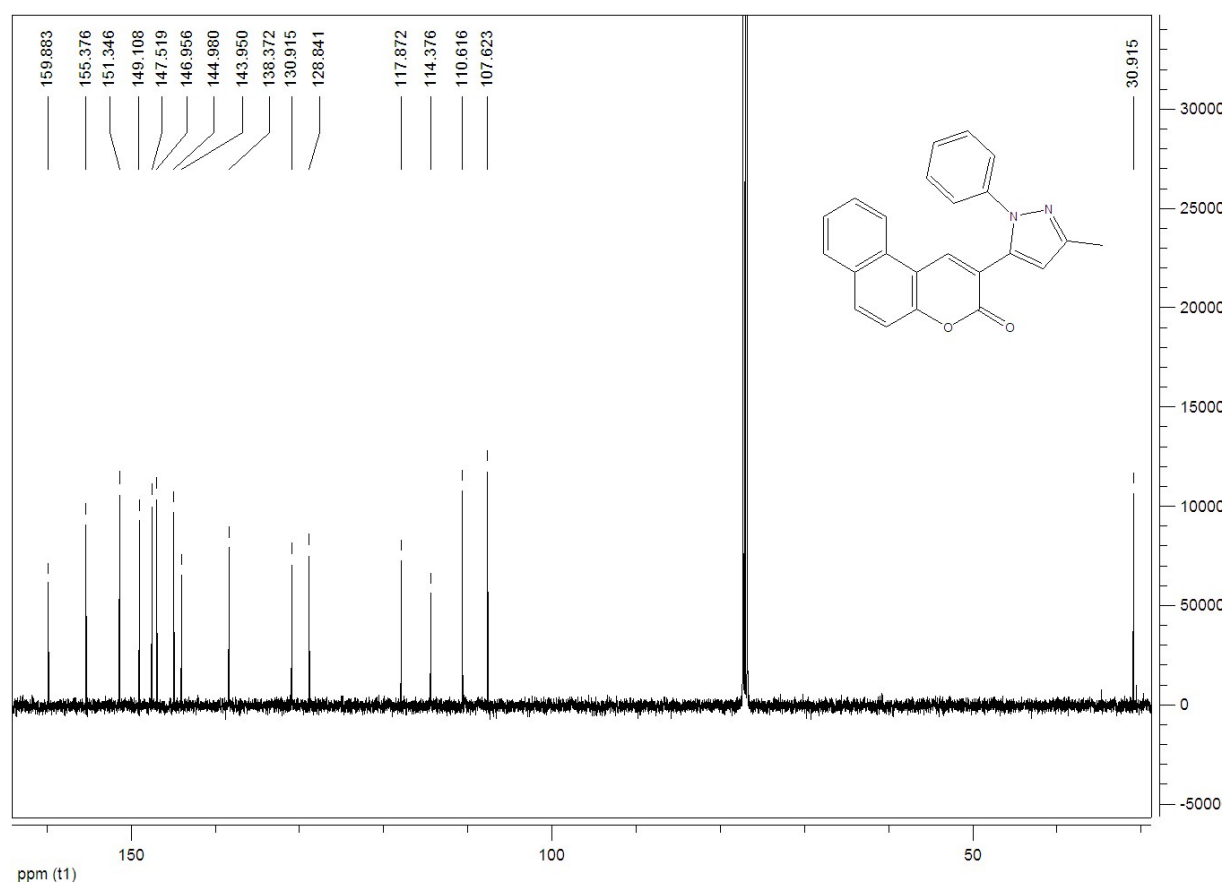

$^1\text{H}$  NMR and  $^{13}\text{C}$  NMR of compound **4ac**

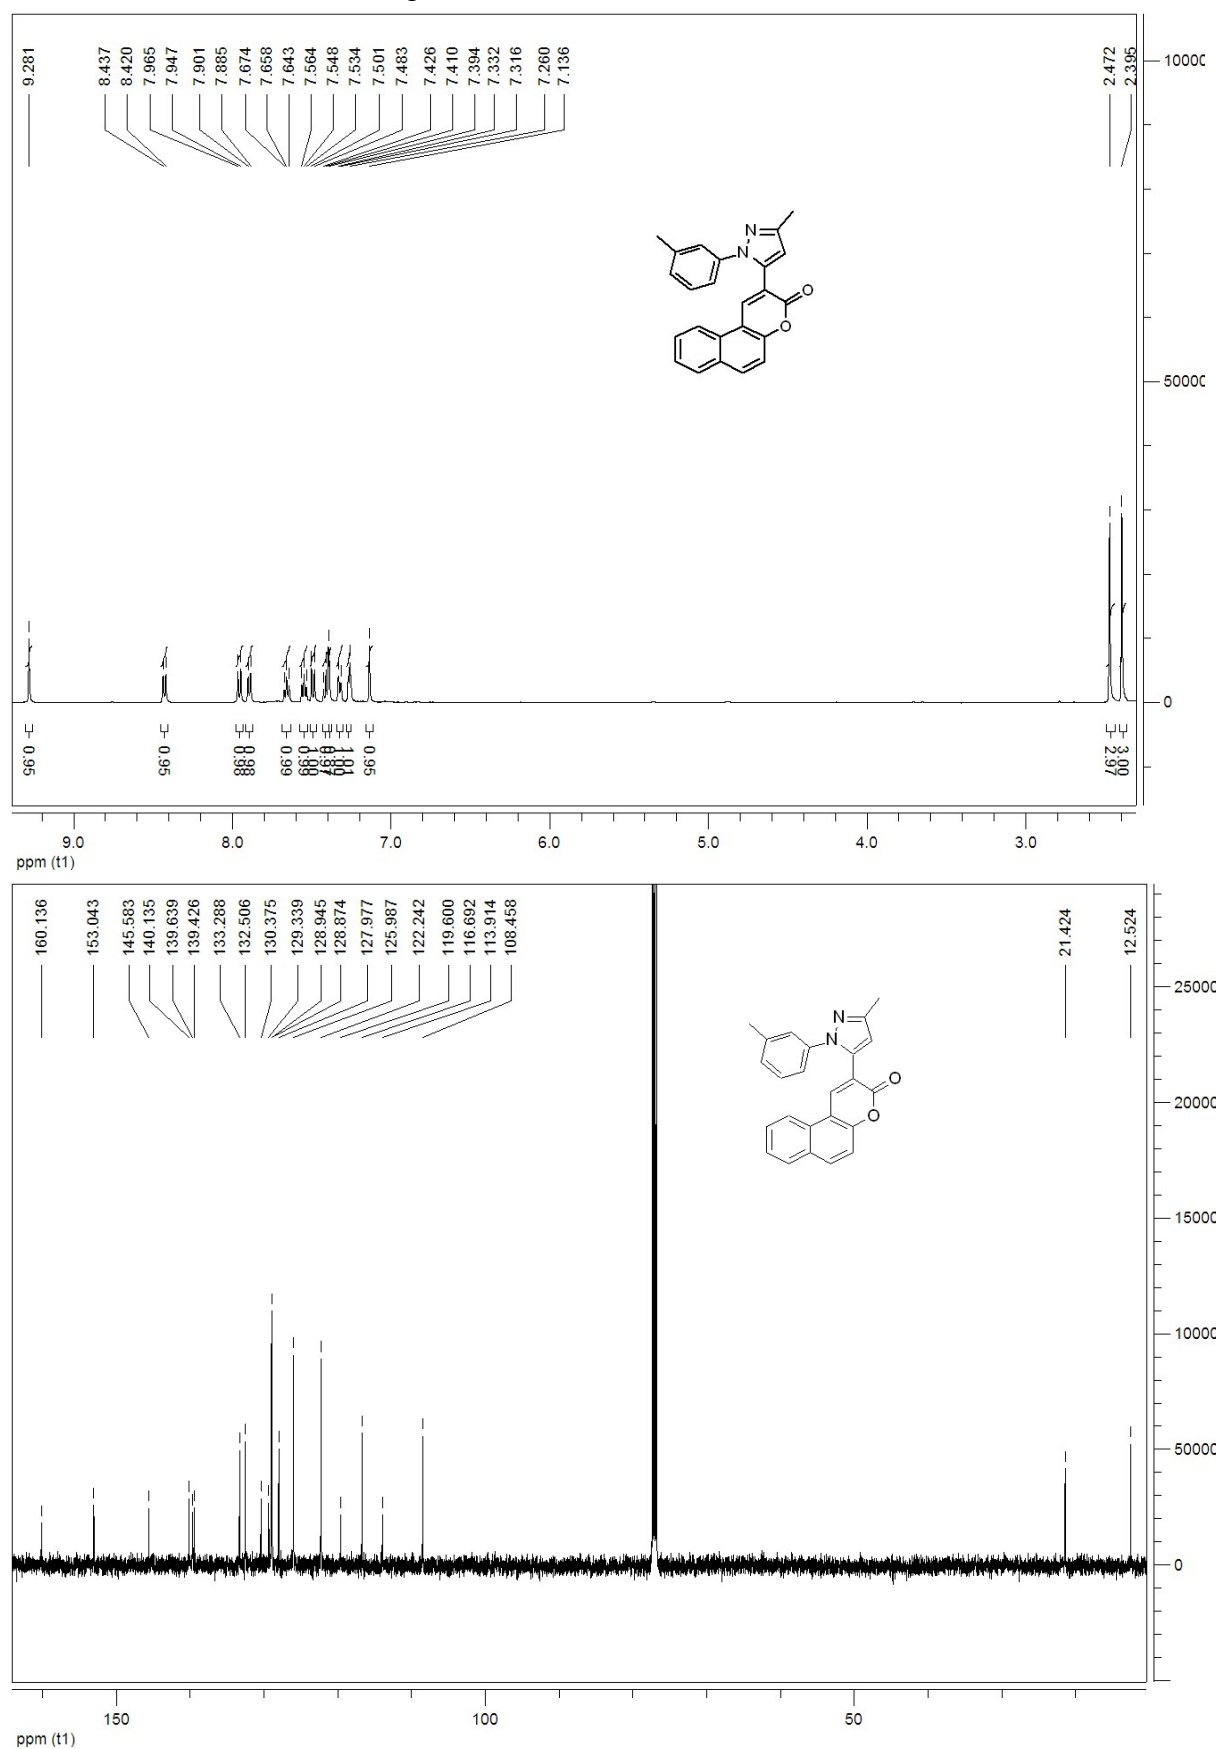

<sup>1</sup>H NMR and <sup>13</sup>C NMR of compound **4ad**

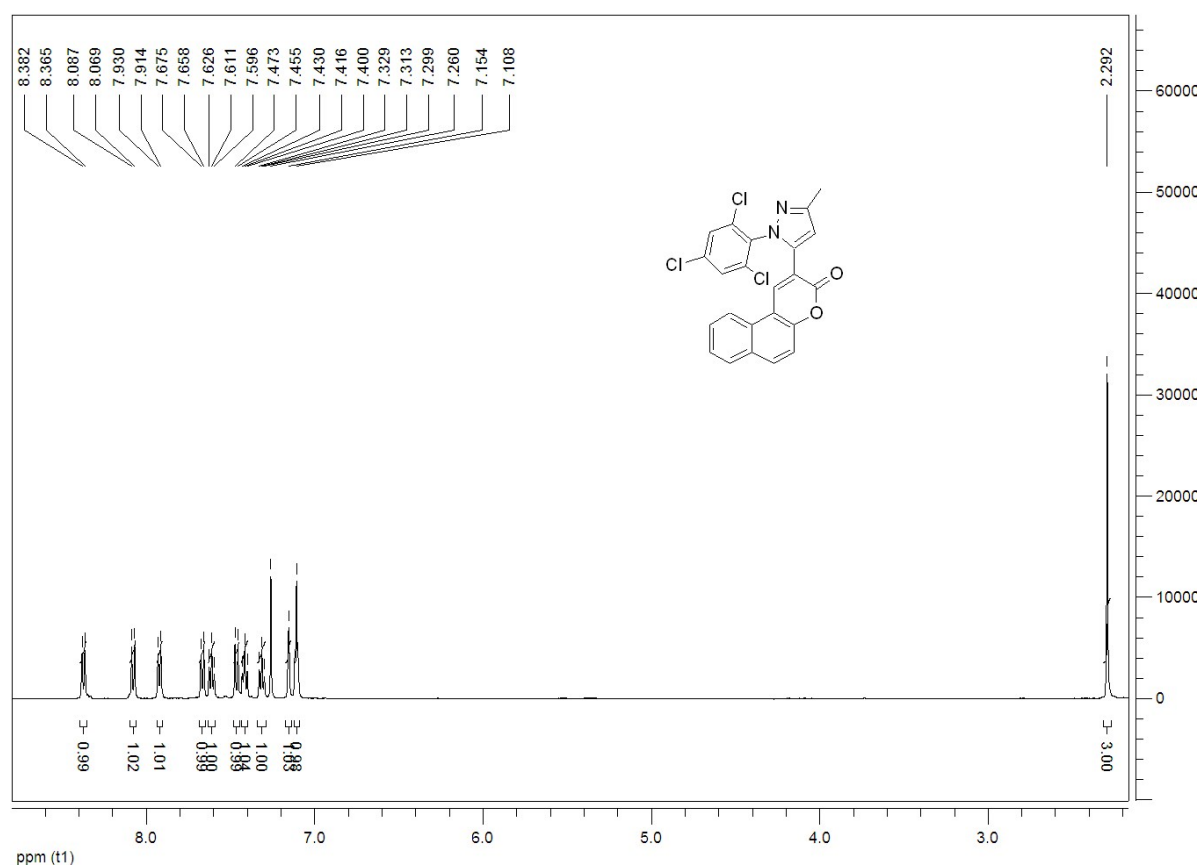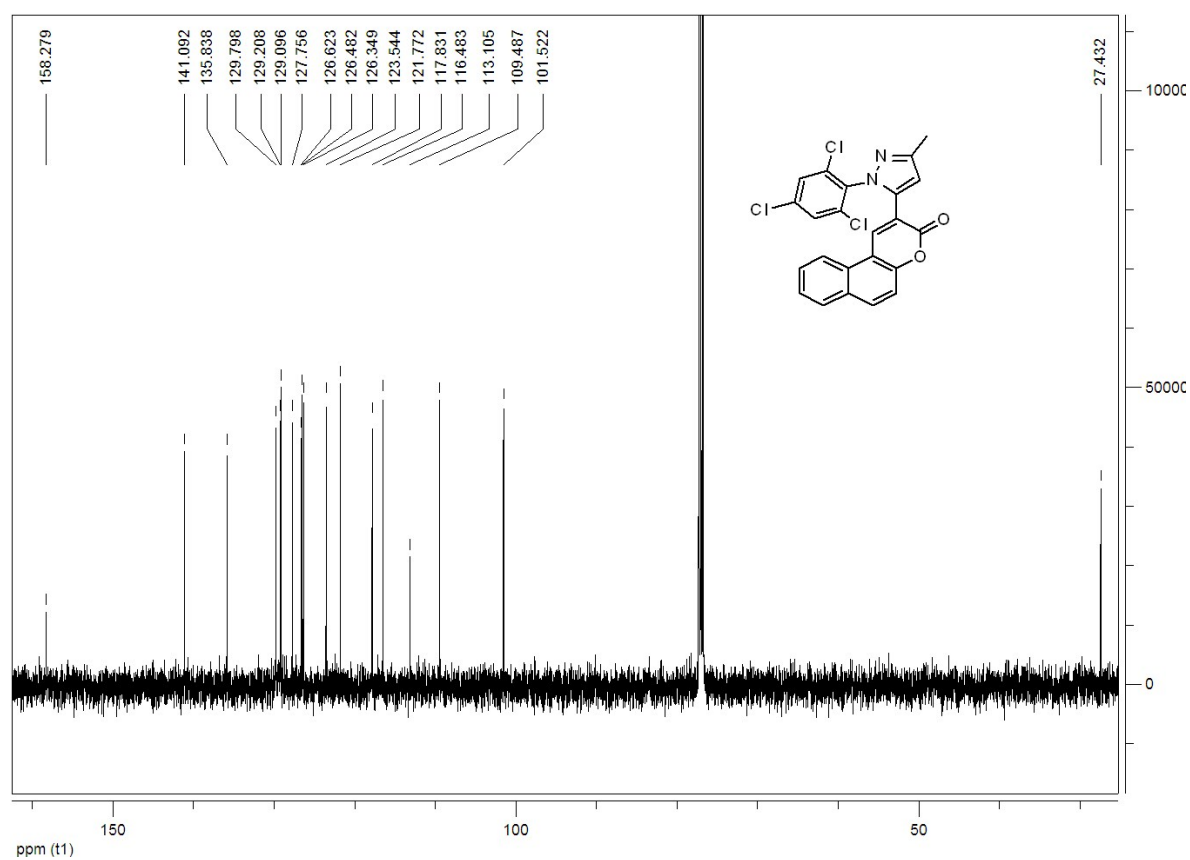

$^1\text{H}$  NMR and  $^{13}\text{C}$  NMR of compound **4ae**

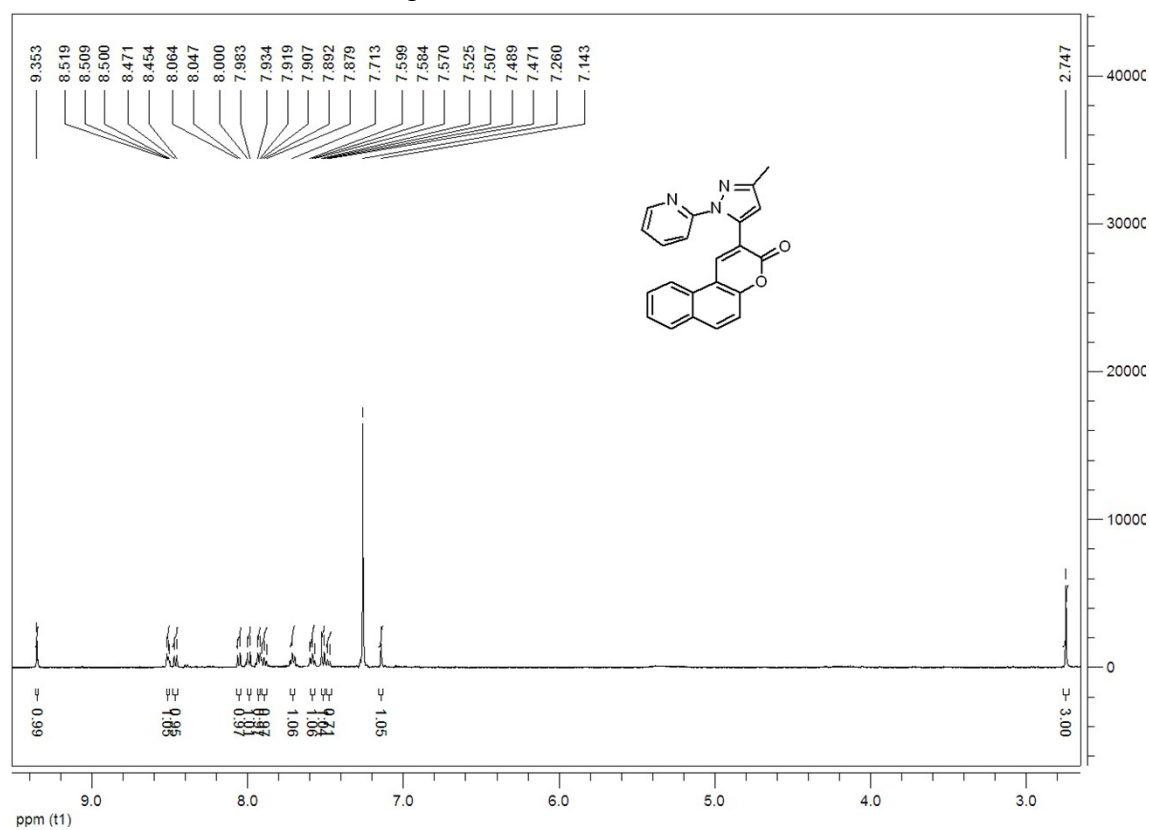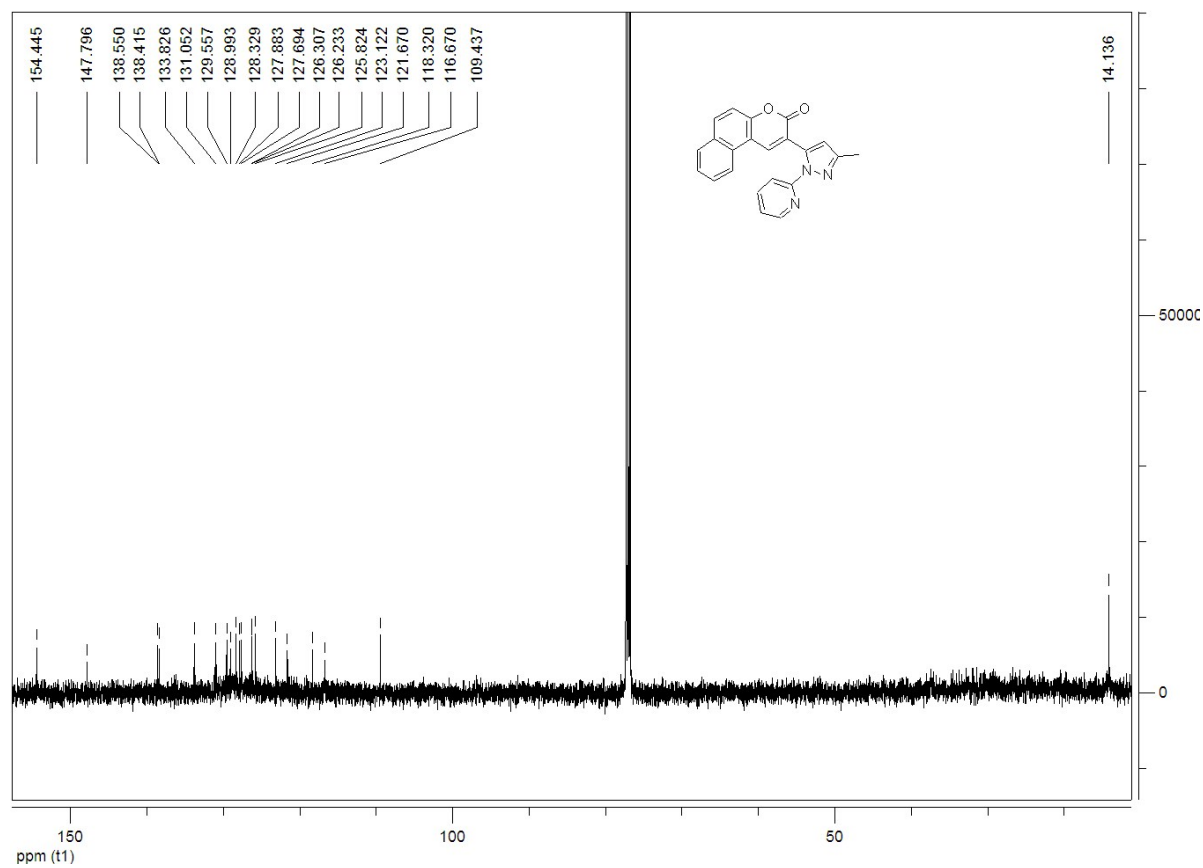

Supplement: c5ra01677k1.pdf [file c5ra01677k1.pdf]
